# Supplementary material for: Scoping review protocol: education initiatives for medical psychiatry collaborative care
Source: PubMed Central journal article supplement — BMJ Open. 2017 Sep 3;7(9):e015886. doi: 10.1136/bmjopen-2017-015886 (PMC5588937; doi:10.1136/bmjopen-2017-015886), 2017-09-03
Supplement: bmjopen-2017-015886.draft_revisions.pdf [file bmjopen-2017-015886.draft_revisions.pdf]

# BMJ Open

BMJ Open is committed to open peer review. As part of this commitment we make the peer review history of every article we publish publicly available.

When an article is published we post the peer reviewers' comments and the authors' responses online. We also post the versions of the paper that were used during peer review. These are the versions that the peer review comments apply to.

The versions of the paper that follow are the versions that were submitted during the peer review process. They are not the versions of record or the final published versions. They should not be cited or distributed as the published version of this manuscript.

BMJ Open is an open access journal and the full, final, typeset and author-corrected version of record of the manuscript is available on our site with no access controls, subscription charges or pay-per-view fees (<http://bmjopen.bmj.com>).

If you have any questions on BMJ Open's open peer review process please email [editorial.bmjopen@bmj.com](mailto:editorial.bmjopen@bmj.com)

# BMJ Open

## Scoping Review Protocol: Education Initiatives for Medical Psychiatry Collaborative Care

|                                 |                                                                                                                                                                                                                                                                                                                                                                                                                                                                                                                                                                                                                                                                                                                                                                                                                                                      |
|---------------------------------|------------------------------------------------------------------------------------------------------------------------------------------------------------------------------------------------------------------------------------------------------------------------------------------------------------------------------------------------------------------------------------------------------------------------------------------------------------------------------------------------------------------------------------------------------------------------------------------------------------------------------------------------------------------------------------------------------------------------------------------------------------------------------------------------------------------------------------------------------|
| Journal:                        | <i>BMJ Open</i>                                                                                                                                                                                                                                                                                                                                                                                                                                                                                                                                                                                                                                                                                                                                                                                                                                      |
| Manuscript ID                   | bmjopen-2017-015886                                                                                                                                                                                                                                                                                                                                                                                                                                                                                                                                                                                                                                                                                                                                                                                                                                  |
| Article Type:                   | Protocol                                                                                                                                                                                                                                                                                                                                                                                                                                                                                                                                                                                                                                                                                                                                                                                                                                             |
| Date Submitted by the Author:   | 09-Jan-2017                                                                                                                                                                                                                                                                                                                                                                                                                                                                                                                                                                                                                                                                                                                                                                                                                                          |
| Complete List of Authors:       | Shen, Nelson; University of Toronto, Institute of Health Policy, Management and Evaluation<br>Sockalingam, Sanjeev; University of Toronto, Department of Psychiatry; University Health Network<br>Abi Jaoude, Alexxa; Centre for Addiction and Mental Health, Education<br>Bailey, Sharon; Centre for Addiction and Mental Health<br>Bernier, Thérèse; University of Toronto, Institute of Health Policy, Management and Evaluation<br>Freeland, Alison; Trillium Health Partners; University of Toronto, Department of Psychiatry<br>Hawa, Aceel; Centre for Addiction and Mental Health, Education<br>Hollenberg, Elisa; Centre for Addiction and Mental Health, Education<br>Woldemichael, Bethel; Centre for Addiction and Mental Health, Education<br>Wiljer, David; University Health Network; University of Toronto, Department of Psychiatry |
| <b>Primary Subject Heading</b>: | Medical education and training                                                                                                                                                                                                                                                                                                                                                                                                                                                                                                                                                                                                                                                                                                                                                                                                                       |
| Secondary Subject Heading:      | Mental health, Addiction                                                                                                                                                                                                                                                                                                                                                                                                                                                                                                                                                                                                                                                                                                                                                                                                                             |
| Keywords:                       | collaborative care, PRIMARY CARE, MENTAL HEALTH, Integrated Care, MEDICAL EDUCATION & TRAINING, PSYCHIATRY                                                                                                                                                                                                                                                                                                                                                                                                                                                                                                                                                                                                                                                                                                                                           |
|                                 |                                                                                                                                                                                                                                                                                                                                                                                                                                                                                                                                                                                                                                                                                                                                                                                                                                                      |

SCHOLARONE™  
Manuscripts

## TITLE:

Scoping Review Protocol: Education Initiatives for Medical Psychiatry Collaborative Care

## AUTHORS:

Nelson Shen<sup>1</sup>, Sanjeev Sockalingam<sup>2,3</sup>, Alexxa Abi Jaoude<sup>4</sup>, Sharon Bailey<sup>4</sup>, Thérèse Bernier<sup>1</sup>, Alison Freeland<sup>2,5</sup>, Aceel Hawa<sup>4</sup>, Elisa Hollenberg<sup>4</sup>, Bethel Woldemichael<sup>4</sup>, David Wiljer<sup>1,2,3</sup>

## Institutions:

<sup>1</sup> Institute of Health Policy, Management and Evaluation, University of Toronto, Toronto, Canada

<sup>2</sup> Department of Psychiatry, University of Toronto, Toronto, Canada

<sup>3</sup> Centre for Mental Health, University Health Network, Toronto, Canada

<sup>4</sup> Education, Centre for Addiction and Mental Health, Toronto, Canada

<sup>5</sup> Trillium Health Partners, Mississauga, Canada

## Corresponding Author:

David Wiljer, PhD

University Health Network

190 Elizabeth Street, Room #441

Toronto, Ontario

Canada

Phone: 416 340 6322

Email: david.wiljer@uhn.ca

Word Count: 2752

## ABSTRACT

### Introduction:

The collaborative care model is an approach providing care to those with mental health and addictions disorders in the primary care setting. There is a robust evidence base demonstrating its clinical and cost effectiveness in comparison to usual care; however, the transitioning to this new paradigm of care has been difficult. While there are efforts to train and prepare healthcare professionals, not much is known about the current state of collaborative care training programs. The objective of this scoping review is to understand how widespread these collaborative education initiatives are, how they are implemented, and their impacts.

### Methods and analysis:

The scoping review methodology uses the established review methodology by Arksey and O'Malley. The search strategy was developed by a medical librarian and will be applied eight different databases spanning multiple disciplines. A two-stage screening process consisting of a title and abstract scan and a full-text review will be used to determine the eligibility of articles. To be included, articles must report on an existing collaborative care education initiative for healthcare providers. All articles will be independently assessed for eligibility by pairs of reviewers and all eligible articles will be abstracted and charted in duplicate using a standardized form. The extracted data will undergo a 'narrative review' or a descriptive analysis of the contextual or process-oriented data and simple quantitative analysis using descriptive statistics.

### Ethics and dissemination:

Research ethics is not required for this scoping review. The results of this scoping review will inform the development of a collaborative care training initiative emerging from the Medical Psychiatry Alliance, a four-institution philanthropic partnership in Ontario, Canada. The results

1  
2  
3 will also be presented at relevant national and international conferences and published in a peer-  
4  
5 reviewed journal.  
6  
7

8 **Keywords:** Collaborative care; Primary care; Mental Health; Addictions; Psychiatry; Integrated  
9  
10 care; Education; Training  
11

12 **Strengths and Limitations:**  
13

- 14  
15  
16  
17  
18  
19  
20  
21  
22  
23  
24  
25  
26  
27  
28  
29  
30  
31  
32  
33  
34  
35  
36  
37  
38  
39  
40  
41  
42  
43  
44  
45  
46  
47  
48  
49  
50  
51  
52  
53  
54  
55  
56  
57  
58  
59  
60
- Strengths of this study include: novelty, timeliness, and the importance of the topic to the delivery of mental health and addiction care; use of an established scoping review methodology; consultation with an experienced medical librarian in developing a multi-disciplinary search strategy; and a rigorous study selection and data extraction processes carried out in tandem with validation from content experts.
  - A limitation of the review is the potential to miss relevant articles given that education is not always separated from the implementation of collaborative care; however, the reference lists of included articles, relevant literature reviews, and key reports will be hand-searched to identify articles missed by the search strategy.

**BACKGROUND:**

Mental health and addictions disorders are the fifth leading contributor to the global disease burden accounting for 7.4% of total disease burden. It is also the most disabling disorder accounting for 22.9% of the global non-fatal burden of disease (i.e., years lived with disability) [1]. Despite being non-fatal in most cases, approximately one-fifth of adults experienced a common mental health disorder within the past year and 29.2% across their lifetime [2]. In North America, there is a growing disparity of unmet needs for mental health services [3,4]. The current supply of psychiatrists do not meet the increasing demands and current practice patterns create substantial barriers hindering access to psychiatric assessment and treatment [5–8]. In recent years, primary care physicians have been increasingly involved in providing care for those seeking mental health as there has been significant increases in visits to primary care physicians and a corresponding decline in visits to psychiatrists [9].

In many health systems, primary care is most commonly the first contact point for those seeking mental health treatment [10,11]; however, the individuals seeking care in these settings are often receiving sub-optimal care as providers are not properly equipped or trained to manage complex physical and mental health conditions [12]. Other systemic issues such as a lack of resources, misaligned incentives, an ineffective referral process, and the separation of mental health services from other healthcare services also contribute to the treatment gap [12,13]. The disconnect between the two fields makes it difficult for individuals to receive the proper care especially for those with co-morbidity or multi-morbidity and may further exacerbate their condition or lead to premature death due to their physical health conditions [14,15]. A 2014 systematic review [16] reported that 91.2% (135/148) of studies found that mortality was

1  
2  
3 significantly higher among people with mental disorders than among the comparison population.  
4  
5 The meta-analysis found that people with mental disorders have a 2.22 time higher mortality rate  
6  
7 than those without and lose about a decade of their life.  
8  
9

10  
11  
12 For a greater part of the last two decades, a growing and robust evidence base has made the case  
13  
14 for integrating mental healthcare into the primary care setting through a collaborative care  
15  
16 model. Several meta-analyses [17–19] have demonstrated that collaborative care model can be  
17  
18 more effective in treating mental health disorders than usual care. A 2013 Cochrane review [19]  
19  
20 found a significantly greater improvement in depression and anxiety for adults when treated with  
21  
22 the collaborative care model in the short, medium, and long terms in comparison to usual care.  
23  
24 There was also evidence of benefit in medication use, mental health quality of life, and patient  
25  
26 satisfaction. The collaborative care model has also demonstrated its value by improving quality  
27  
28 of life for co-morbid patients for no or modest additional cost [20].  
29  
30  
31  
32  
33  
34  
35

36 Collaborative care is often used interchangeably with other terms (e.g., mental health integration,  
37  
38 integrated care, integrated mental health) to describe a range of models of care that consist of  
39  
40 healthcare professionals working in partnership in a primary care setting to deliver mental  
41  
42 healthcare; however, the degree of integration of the two vary depending on model [21].  
43  
44 Recognizing the lack of a standard evidence-based integrated care model, a working group from  
45  
46 the American Psychiatric Association (APA) and the Academy of Psychosomatic Medicine  
47  
48 (APM) developed a collaborative care model that contained four key principles and  
49  
50 demonstrated how it could be adapted for a number of existing integrative care settings. Derived  
51  
52 from the seminal research by Katon et al. [22] and Wagner's Chronic Care Model [23],  
53  
54  
55  
56  
57  
58  
59  
60

1  
2  
3 APA/APM Collaborative Care model [24] consists of four essential elements. The elements  
4  
5 include provision of care that is 1) team-driven, 2) population-focused, 3) measurement-guided,  
6  
7 and 4) evidence-based. The focal point is the collaborative care team which consists of the  
8  
9 integration of a multidisciplinary group of professionals (e.g., office and support staff, nurses,  
10  
11 care managers, primary care providers, and appropriate specialists), beyond the “physician as  
12  
13 treatment team”, in providing and supporting care and implementing and revising the treatment  
14  
15 plan. This may include a psychiatric nurse practitioner, social worker, licensed counsellor or  
16  
17 therapist, psychologist, or psychiatrist. The new definition was developed to support informed  
18  
19 decision-making by policy-makers, healthcare providers, service delivery organizations, the  
20  
21 general public, and to help standardize future training in this area.  
22  
23  
24  
25  
26  
27  
28

29 Despite the increasing recognition and implementation of the collaborative care model, there  
30  
31 remain difficulties in implementation as there is a lack of adequately prepared workforce [25].  
32  
33

34 The transition from a traditional care delivery model is a challenge as there are many new  
35  
36 processes and systems-level differences between integrated behavioural health and traditional  
37  
38 primary care settings that new team members must navigate. For instance, when using a  
39  
40 collaborative care model, all team members may need to learn how to implement measurement  
41  
42 based care, systematic use of outcome measures to track response to treatment, treatment to  
43  
44 target, population-based care principles, and to apply all of these approaches in a team-based  
45  
46 context [26]. Furthermore, transitioning to a collaborative care model will require healthcare  
47  
48 providers (e.g., primary care physicians, psychiatric consultants, and behavioural health  
49  
50 providers) to adapt their respective training, workflows, experiences, and philosophies to the  
51  
52 group dynamics of a team-based environment [27]. Pre- and post-licensure training in  
53  
54  
55  
56  
57  
58  
59  
60

1  
2  
3 interprofessional collaboration is considered necessary for all team members to learn more about  
4  
5 their respective roles, scopes of practice, strengths and skills, and team processes [26,28]. There  
6  
7 is also a need to develop targeted clinical competencies and to acquire a broad enough medical  
8  
9 knowledge base to address the wide range of mental health and general medical concerns in a  
10  
11 primary care patient population [26].  
12  
13

14  
15  
16  
17 Many integrated care settings have taken the initiative to provide workplace training for all team  
18  
19 members [25]. A variety of training approaches have been implemented, including training by  
20  
21 internal or external experts, onsite or offsite sessions, onboarding processes for new employees,  
22  
23 training manuals, shadowing processes and peer mentoring [25,27]. However, there have been  
24  
25 calls for increased pre-licensure training to take the burden off of such workplace training  
26  
27 programs that can be expensive and resource-intensive [25]. Furthermore, a recent editorial [29]  
28  
29 has identified the need to move beyond competency-based training in integrated care and called  
30  
31 for integration of theoretical frameworks, namely adaptive expertise, to better prepare future  
32  
33 health care professionals for managing complexity within integrated care settings.  
34  
35  
36  
37  
38  
39

40  
41 While there have been tremendous efforts in the development of the collaborative care model  
42  
43 and the training supports, not much is known about the current scope of integrated care  
44  
45 education, how it is delivered, to whom, in what contexts, the content of the training, and  
46  
47 whether it is effective. There is a need to collect all the knowledge and experiences from existing  
48  
49 training programs, continually improve current process of these programs, and to support the  
50  
51 development of new programs. The objective of this scoping review is to gain an understanding  
52  
53 of the current landscape of integrated care education.  
54  
55  
56  
57  
58  
59  
60

## METHODS

The methodology for this review draws upon Arksey and O'Malley's seminal framework [30] for scoping reviews as the foundation and more recent advancements to the methodology [31,32]. While this is not a systematic review, this protocol follows the relevant aspects of the Preferred Reporting Items for Systematic Review and Meta-Analysis Protocols (PRISMA-P) guidelines [33] to ensure rigour in reporting the methodology.

### Stage 1: identifying the research question

This scoping review is being conducted to inform the development of a collaborative care training initiative emerging from the Medical Psychiatry Alliance, a four-institution, Ministry of Health and Long-Term Care, and philanthropic partnership in Ontario, Canada. The objective of this review is to understand the current state of collaborative care education initiatives by identifying existing initiatives (e.g., training programs, interventions) reported in both academic and grey literature. To meet this objective, this review asks the following questions:

- What educational interventions exist within integrated collaborative care programs in hospital, community, and primary care settings?
- What aspects of collaborative care are taught in the educational interventions?
- How well do the interventions incorporate the core collaborative care principles as outlined in the APA/APM document?
- How were the interventions delivered?
- What were the outcomes of the program (e.g., user perceptions, effectiveness, behaviour change, clinical impact)?

- What were the critical success factors and lessons learned?

## Stage 2: identifying relevant studies

The search strategy was iteratively developed by the research team in collaboration with an experienced medical librarian (SB) and implemented in July 2016 in eight electronic databases: MEDLINE, MEDLINE In-Process, PsycINFO, CINAHL, EMBASE, ERIC, Scopus, and ISI Web of Science. These databases were selected to capture a comprehensive sample of literature from health sciences, psychiatry, education, and other disciplines. The search query was first developed for Medline, which consisted of the following MeSH keywords and related terms for the primary care, integrated care, education, and mental health services, personnel, and conditions (see Additional File 1 for full strategy). The searches were limited to articles in English and published after 1995 – when the collaborative care model was first introduced [22,24]. The search terms were then translated for use in the other databases. Applying the same search string to ISI Web of Science (interdisciplinary) required some modifications and a different approach to reduce the noise in the results. Specifically, the research categories and subject area limiters were used to reduce the yield to a manageable volume while maintaining the specificity required for this review. The first 100 search results from each database were reviewed by the research team to ensure validity of the search strategy.

The results from the search were imported into Mendeley desktop reference manager where the citations were collated and de-duplicated. The research team were granted access to the citations and articles using the Mendeley web-based collaboration function. The citations were then

1  
2  
3 copied and pasted into a spreadsheet for use in the subsequent eligibility screening and charting  
4  
5 processes.  
6  
7  
8  
9

### 10 **Stage 3: study selection**

11  
12 A two-stage screening process consisting of a title and abstract scan and a full-text review will be  
13 used to determine the eligibility of articles. Both stages will follow the same process, where  
14 every article will be independently reviewed in pairs and the results will be documented on the  
15 spreadsheet. At the end of each round, the ratings will be compared and resolved by the two  
16 reviewers or a third reviewer when consensus is not achieved. Any ambiguities regarding the  
17 eligibility of a citation (or article) will be flagged and also be discussed.  
18  
19  
20  
21  
22  
23  
24  
25  
26  
27  
28

29 The citations will be assessed for relevance based on a title and abstract scan. To be relevant for  
30 full-text review, the title and abstract must: focus on providers from different specialities,  
31 disciplines, or sectors working together to offer complementary services or support in delivering  
32 care; be about delivering mental health and addictions care; and describe an existing education  
33 intervention. This review is inclusive of all types of papers and will include empirical studies,  
34 case studies, and commentary articles; however, articles that were viewpoints on how education  
35 programs should be implemented outside of the context of an existing program were excluded.  
36  
37  
38  
39  
40  
41  
42  
43  
44  
45  
46  
47

48 The criteria will be piloted by the reviewers to refine and establish a common understanding of  
49 the inclusion criteria. After a training session, 20% of the Medline citations will be  
50 independently reviewed by four reviewers to establish inter-rater reliability (IRR). The results of  
51 the review will be compared and the interrater reliability will be calculated. The threshold for  
52  
53  
54  
55  
56  
57  
58  
59  
60

1  
2  
3 IRR is set at an average Cohen's K of 0.70 indicating substantial agreement [34]. The pilot will  
4 be run again if the threshold was not met. If met, the remaining articles will then be divided and  
5 assigned to two sets of pairs for independent review. These adjustments to the inclusion  
6 exclusion process are appropriate as they provide the team with opportunities to become familiar  
7 with the data and to reduce workload [31,32]. This protocol made an additional adjustment by  
8 adding the IRR in order to establish agreement between reviewers and provide more context to  
9 the study selection process. Regardless of the IRR outcome, a meeting about the process will be  
10 held to compare the results, resolve the disagreements, and troubleshoot the challenges that arose  
11 during the title-abstract review process.  
12  
13  
14  
15  
16  
17  
18  
19  
20  
21  
22  
23  
24  
25  
26

27 Relevant articles identified in the title and abstract scan will undergo a full-text review to  
28 confirm the articles eligibility for the review. The full-text review follows the same process as  
29 the title and abstract scan. To be included, the article must be about a collaborative care  
30 education initiative for healthcare providers. The full-text review form asked reviewers to assess  
31 each article using the following questions:  
32  
33  
34  
35  
36  
37

- 38 1. Does the article describe/discuss the provision of care related to mental health in a  
39 primary care setting?  
40  
41
- 42 2. Does the article describe an education intervention/program?  
43  
44
- 45 3. Does the education intervention focus on delivering team-based care?  
46  
47  
48  
49  
50

#### 51 **Step 4: charting the data**

52 A standardized charting form will be developed by the research team to allow the investigators to  
53 categorize or 'chart' the data. The high-level domains for the charting form consist of article  
54  
55  
56  
57  
58  
59  
60

1  
2  
3 details, study details (if applicable), initiative details, and implementation factors. The specifics  
4  
5 of each domain are outlined in Table 1. There will be a training session to trial the charting form  
6  
7 and ensure there is a common understanding of the categories and how to use the form. The full-  
8  
9 text reviewers will be asked if there are any additional variables emerging from the full-text  
10  
11 review to consider for charting. The form will be piloted on five to ten articles by the team. This  
12  
13 will consist of independent charting by the reviewers and validation by the senior investigators.  
14  
15 A final round of feedback on the form will be solicited prior to the charting process. The charting  
16  
17 will also consist of independent charting by the reviewers and validation by the senior  
18  
19 investigators. The charters will be encouraged to provide constant feedback on emerging themes  
20  
21 not captured in the charting form. The form will be revised as required.  
22  
23  
24  
25  
26  
27

28 Table 1. Data charting domains and elaboration of sub-domains.

| 29 Domain/<br>30 Sub-Domains            | 31 Description                                                                               |
|-----------------------------------------|----------------------------------------------------------------------------------------------|
| 32 <b>Article details</b>               |                                                                                              |
| 33 Article type                         | 34 Is the article an empirical study, case study, or commentary?                             |
| 35 Year                                 | 36 Article Year                                                                              |
| 37 Country                              | 38 Which country is this article from?                                                       |
| 39 <b>Study details (if applicable)</b> |                                                                                              |
| 40 Study design                         | 41 If it is an empirical article, what was the study design? Report as described by authors. |
| 42 Participants                         | 43 Who were the study participants?                                                          |
| 44 Intervention                         | 45 What was the intervention? Report as described by the author.                             |
| 46 Comparator                           | 47 What was the comparator (if applicable)?                                                  |
| 48 Study outcomes                       | 49 What did the authors identify as the study outcomes?                                      |
| 50 Outcomes                             | 51 What were the main results of the study?                                                  |
| 52 <b>Initiative details</b>            |                                                                                              |
| 53 Name                                 | 54 What is the name of the program (if applicable)?                                          |
| 55 Setting                              | 56 Where does the education program take place? (e.g., community, hospital, university)      |
| 57 Participants                         | 58 Who were the participants of the program?                                                 |
| 59 Program delivery                     | 60 How is the program delivered? (e.g., seminar, lecture, course, in-service training).      |
| 61 Instructors                          | 62 Who are the facilitators/instructors?                                                     |

1  
2  
3  
4  
5  
6  
7  
8  
9  
10  
11  
12  
13  
14  
15  
16  
17  
18  
19  
20  
21  
22  
23  
24  
25  
26  
27  
28  
29  
30  
31  
32  
33  
34  
35  
36  
37  
38  
39  
40  
41  
42  
43  
44  
45  
46  
47  
48  
49  
50  
51  
52  
53  
54  
55  
56  
57  
58  
59  
60

|                                |                                                                                                                                                            |
|--------------------------------|------------------------------------------------------------------------------------------------------------------------------------------------------------|
| Program length                 | How long was the program/intervention?                                                                                                                     |
| <i>APA/APM Principles</i> [24] |                                                                                                                                                            |
| 1. <i>Team Driven</i>          | Does the program teach a team-based approach of multi-professionals to provide and support care and monitor treatment plans?                               |
| 2. <i>Specific population</i>  | Does the program focus on the provision of care and health outcomes of a defined population of patients?                                                   |
| 3. <i>Measurement</i>          | Does the program focus on systematic, disease-specific, patient-reported outcome measures (e.g., symptom rating scales) to drive clinical decision-making? |
| 4. <i>Evidence based</i>       | Does the program focus on the application of proven treatments within an individual clinical context to achieve MBC outcomes?                              |
| <b>Implementation factors</b>  |                                                                                                                                                            |
| Success                        | How did the authors define program success?                                                                                                                |
| Enablers                       | What factors that contributed to the success of the program?                                                                                               |
| Barriers                       | What factors may have detracted from the success of the program?                                                                                           |
| Recommendations                | What were the author's recommendations based on their experiences?                                                                                         |

---

### Stage 5: collating, summarizing, and reporting the results

The data will undergo a 'narrative review' or a descriptive analysis of the contextual or process-oriented data. The extracted data will also undergo simple quantitative analysis using descriptive statistics (e.g., frequencies, central tendency measures) to provide numerical summaries of the education initiatives and article or study characteristics [30]. The articles will not be assessed for quality as it is outside the scope of this review; however, details of the included articles will be reported in a summary table to provide context of the maturity of the evidence. Details of the education initiatives will also be summarized in a table. Learner and clinical outcomes reported in the studies will be classified based on the Kirkpatrick-Barr framework [35] for interprofessional learner outcomes. This framework was selected because of its focus on interprofessional collaboration which can be applicable to the multi-disciplinary setting. Depending on the number of studies, a table summary of program evaluations will also be

1  
2  
3 reported. Lastly, the data for implementation factors sub-domains will undergo a thematic  
4  
5 analysis to be examined for similarities, patterns, differences, and outliers.  
6  
7  
8  
9

## 10 **DISCUSSION/CONCLUSION**

11  
12 The underlying purpose of this scoping review is to gain a broad-stroke understanding of the  
13 current state of collaborative care education initiatives. This protocol reports a comprehensive,  
14 rigorous, and transparent methodology. Many various systematic literature review approaches  
15 were considered; however, the scoping review methodology is most appropriate given the lack of  
16 knowledge synthesis on this subject. To the authors' knowledge, there has been no prior attempt  
17 to establish a baseline of knowledge regarding collaborative care education initiatives. This  
18 review makes a contribution of the advancement of research on this subject and comment on the  
19 maturity of the body of literature by identifying gaps in knowledge and research. Through the  
20 publication of the results and dissemination at relevant conferences, the results of this review  
21 could guide the direction of future research. While the main focus of this review is to take an  
22 inventory of existing programs and their processes, there may also be a potential for this review  
23 to provide a preliminary understanding on the effectiveness of current efforts in educating the  
24 health professions about collaborative care.  
25  
26  
27  
28  
29  
30  
31  
32  
33  
34  
35  
36  
37  
38  
39  
40  
41  
42  
43  
44  
45

46 From an implementation perspective, this review will provide insights on how collaborative care  
47 education initiatives have been integrated and to what extent. By identifying the past and current  
48 education initiatives, this review will establish a foundational understanding of critical success  
49 factors and best practices in delivering these programs. The results from this review may inform  
50 the design of new initiatives and the policies which support them; moreover, future  
51  
52  
53  
54  
55  
56  
57  
58  
59  
60

1  
2  
3 implementations can learn from the experience of others to avoid potential barriers and focus on  
4  
5 enablers to increase the chances of success of their programs – existing or new.  
6  
7  
8  
9

10 **Acknowledgements:** The authors' work is supported in part by the Medical Psychiatry Alliance,  
11  
12 a collaborative health partnership of the University of Toronto, the Centre for Addiction and  
13  
14 Mental Health, the Hospital for Sick Children, Trillium Health Partners, the Ontario Ministry of  
15  
16 Health and Long-Term Care, and an anonymous donor.  
17  
18

19 **Authors' contributions:** NS led the design and conceptualization of this work and drafted the  
20  
21 protocol. AA, TB, AH, EH, BW were involved in the conceptualization of the review design,  
22  
23 specifically in establishing the inclusion and exclusion criteria. EH and BW drafted the  
24  
25 background section of the protocol and provided feedback on the methodology and the  
26  
27 manuscript. SB developed the search strategy, conducted the search, provided feedback on the  
28  
29 manuscript, and copy-edited the manuscript. AF, SS, and DW provided guidance to the  
30  
31 conceptualization and design of the study, data analyses, and have revised all drafts of this  
32  
33 manuscript for important intellectual content and clarity. All authors give approval to the  
34  
35 publishing of this protocol manuscript.  
36  
37  
38  
39

40 **Competing interests:** The authors declare that they have no competing interests.  
41  
42

43 **Funding:** Not applicable  
44  
45  
46  
47

## 48 REFERENCES

- 49  
50 1 Whiteford HA, Degenhardt L, Rehm J, *et al.* Global burden of disease attributable to  
51  
52 mental and substance use disorders: Findings from the Global Burden of Disease Study  
53  
54 2010. *Lancet* 2013;**382**:1575–86. doi:10.1016/S0140-6736(13)61611-6  
55  
56  
57  
58  
59  
60

- 1  
2  
3 2 Steel Z, Marnane C, Iranpour C, *et al.* The global prevalence of common mental disorders:  
4 A systematic review and meta-analysis 1980-2013. *Int J Epidemiol* 2014;**43**:476–93.  
5  
6 doi:10.1093/ije/dyu038  
7  
8  
9  
10 3 Roll JM, Kennedy J, Tran M, *et al.* Disparities in unmet need for mental health services in  
11 the United States, 1997-2010. *Psychiatr Serv* 2013;**64**:80–2.  
12  
13 doi:10.1176/appi.ps.201200071  
14  
15  
16  
17 4 Sunderland A, Findlay LC. Perceived need for mental health care in Canada: Results from  
18 the 2012 Canadian community health survey – mental health. *Heal Reports* 2013;**24**:3–9.  
19  
20 doi:82-003-X  
21  
22  
23  
24 5 Goldner EM, Jones W, Fang ML. Access to and waiting time for psychiatrist services in a  
25 Canadian urban area: A study in real time. *Can J Psychiatry* 2011;**56**:474–80.  
26  
27 doi:10.1177/070674371105600805  
28  
29  
30  
31 6 Bishop TF, Press MJ, Keyhani S, *et al.* Acceptance of insurance by psychiatrists and the  
32 implications for access to mental health care. *JAMA psychiatry* 2014;**71**:176–81.  
33  
34 doi:10.1001/jamapsychiatry.2013.2862  
35  
36  
37  
38 7 Kurdyak P, Zaheer J, Cheng J, *et al.* Changes in Characteristics and Practice Patterns of  
39 Ontario Psychiatrists. *Can J Psychiatry* 2016;:706743716661325.  
40  
41 doi:10.1177/0706743716661325  
42  
43  
44  
45 8 Cunningham PJ. Beyond parity: primary care physicians' perspectives on access to mental  
46 health care. *Health Aff (Millwood)* 2009;**28**:w490-501. doi:10.1377/hlthaff.28.3.w490  
47  
48  
49  
50 9 Olfson M, Kroenke K, Wang S, *et al.* Trends in office-based mental health care provided  
51 by psychiatrists and primary care physicians. *J Clin Psychiatry* 2014;**75**:247–53.  
52  
53 doi:10.4088/JCP.13m08834  
54  
55  
56  
57  
58  
59  
60

- 1  
2  
3 10 Wang PS, Lane M, Olfson M, *et al.* Twelve-Month Use of Mental Health Services in the  
4 United States. *Arch Gen Psychiatry* 2005;**62**:629. doi:10.1001/archpsyc.62.6.629  
5  
6  
7  
8 11 Wang PS, Demler O, Olfson M, *et al.* Changing profiles of service sectors used for mental  
9 health care in the United States. *Am J Psychiatry* 2006;**163**:1187–98.  
10 doi:10.1176/appi.ajp.163.7.1187  
11  
12  
13  
14  
15 12 Knickman J, Krishnan R, Pincus H. Improving Access to Effective Care for People With  
16 Mental Health and Substance Use Disorders. *Jama* Published Online First: 2016.  
17 doi:10.1001/jama.2016.13639  
18  
19  
20  
21  
22 13 Lawrence D, Kisely S. Inequalities in healthcare provision for people with severe mental  
23 illness. *J Psychopharmacol* 2010;**24**:61–8. doi:10.1177/1359786810382058  
24  
25  
26  
27 14 Ivbijaro GO, Enum Y, Khan AA, *et al.* Collaborative care: models for treatment of  
28 patients with complex medical-psychiatric conditions. *Curr Psychiatry Rep* 2014;**16**:506.  
29 doi:10.1007/s11920-014-0506-4  
30  
31  
32  
33  
34 15 Patel V, Belkin GS, Chockalingam A, *et al.* Grand Challenges: Integrating Mental Health  
35 Services into Priority Health Care Platforms. *PLoS Med* 2013;**10**.  
36 doi:10.1371/journal.pmed.1001448  
37  
38  
39  
40  
41 16 Walker ER, McGee RE, Druss BG. Mortality in Mental Disorders and Global Disease  
42 Burden Implications. *JAMA Psychiatry* 2015;**72**:334–41.  
43 doi:10.1001/jamapsychiatry.2014.2502  
44  
45  
46  
47  
48 17 Gilbody S. Collaborative Care for Depression. *Arch Intern Med* 2006;**166**:2314.  
49 doi:10.1001/archinte.166.21.2314  
50  
51  
52  
53 18 Thota AB, Sipe TA, Byard GJ, *et al.* Collaborative care to improve the management of  
54 depressive disorders: A community guide systematic review and meta-analysis. *Am J Prev*  
55  
56  
57  
58  
59  
60

- 1  
2  
3  
4  
5  
6  
7  
8  
9  
10  
11  
12  
13  
14  
15  
16  
17  
18  
19  
20  
21  
22  
23  
24  
25  
26  
27  
28  
29  
30  
31  
32  
33  
34  
35  
36  
37  
38  
39  
40  
41  
42  
43  
44  
45  
46  
47  
48  
49  
50  
51  
52  
53  
54  
55  
56  
57  
58  
59  
60
- Med* 2012;**42**:525–38. doi:10.1016/j.amepre.2012.01.019
- 19 Archer J, Bower P, Gilbody S, *et al.* Collaborative care for depression and anxiety problems. *Cochrane Database Syst Rev* 2012;**10**:CD006525. doi:10.1002/14651858.CD006525.pub2
- 20 Katon W, Russo J, Lin EHB, *et al.* Cost-effectiveness of a multicondition collaborative care intervention: a randomized controlled trial. *Arch Gen Psychiatry* 2012;**69**:506–14. doi:10.1001/archgenpsychiatry.2011.1548
- 21 Kwan BM, Nease DE. The State of the Evidence for Integrated Behavioral Health in Primary Care. In: *Integrated Behavioral Health in Primary Care*. New York, NY: : Springer New York 2013. 65–98. doi:10.1007/978-1-4614-6889-9\_5
- 22 Katon W. Collaborative care: Patient satisfaction, outcomes, and medical cost-offset. *Fam Syst Med* 1995;**13**:351–65. doi:10.1037/h0089387
- 23 Wagner EH. Meeting the needs of chronically ill people. *BMJ* 2001;**323**:945–6. doi:10.1136/bmj.323.7319.945
- 24 American Psychiatric Association, Academy of Psychosomatic Medicine. Dissemination of Integrated Care Within Adult Primary Care Settings: The Collaborative Care Model. 2016.
- 25 Hall J, Cohen DJ, Davis M, *et al.* Preparing the Workforce for Behavioral Health and Primary Care Integration. *J Am Board Fam Med* 2015;**28 Suppl 1**:S41-51.
- 26 Ratzliff A, Norfleet K, Chan Y-F, *et al.* Perceived Educational Needs of the Integrated Care Psychiatric Consultant. *Acad Psychiatry* 2015;**39**:448–56.
- 27 Dickinson WP. Strategies to Support the Integration of Behavioral Health and Primary Care: What Have We Learned Thus Far?. *J Am Board Fam Med* 2015;**28 Suppl 1**:S102-6.

- 1  
2  
3 28 Cowley D, Dunaway K, Forstein M, *et al.* Teaching psychiatry residents to work at the  
4 interface of mental health and primary care. *Acad Psychiatry* 2014;**38**:398–404.  
5  
6  
7  
8 29 Sockalingam S, Mulsant BH, Mylopoulos M. Beyond integrated care competencies: The  
9 imperative for adaptive expertise. *Gen Hosp Psychiatry* 2016;**43**:30–1.  
10  
11 doi:10.1016/j.genhosppsy.2016.09.002  
12  
13  
14  
15 30 Arksey H, O'Malley L. Scoping studies: towards a methodological framework. *Int J Soc*  
16  
17 *Res Methodol* 2005;**8**:19–32. doi:10.1080/1364557032000119616  
18  
19  
20 31 Levac D, Colquhoun H, O'Brien KK. Scoping studies: advancing the methodology.  
21  
22 *Implement Sci* 2010;**5**:69. doi:10.1186/1748-5908-5-69  
23  
24  
25 32 Daudt HML, van Mossel C, Scott SJ. Enhancing the scoping study methodology: a large,  
26  
27 inter-professional team's experience with Arksey and O'Malley's framework. *BMC Med*  
28  
29 *Res Methodol* 2013;**13**:48. doi:10.1186/1471-2288-13-48  
30  
31  
32 33 Shamseer L, Moher D, Clarke M, *et al.* Preferred reporting items for systematic review  
33  
34 and meta-analysis protocols (PRISMA-P) 2015: elaboration and explanation. *BMJ*  
35  
36 2015;**349**:g7647–g7647. doi:10.1136/bmj.g7647  
37  
38  
39 34 Landis JR, Koch GG. The measurement of observer agreement for categorical data.  
40  
41 *Biometrics* 1977;**33**:159–74.  
42  
43  
44 35 Barr H, Freeth D, Hammick M, *et al.* Evaluations of Interprofessional Education. 2000.  
45  
46  
47  
48  
49  
50  
51  
52  
53  
54  
55  
56  
57  
58  
59  
60

## Appendix A – Scoping Review Search Strategy

**Table 1. Search strategy for MEDLINE, MEDLINE In-Progress, PsycINFO, EMBASE, and CINAHL.**

NB: Only MEDLINE search strategy included. The search strategies for the other databases were similar in structure with similar search terms and synonyms. Contact the corresponding author for the full search strategy for each database.

| #  | Search Term(s)                                                                                                                                                                                                                                                                                                                                           |
|----|----------------------------------------------------------------------------------------------------------------------------------------------------------------------------------------------------------------------------------------------------------------------------------------------------------------------------------------------------------|
| 1  | Family Practice/ or General Practice/ or Physicians, Family/ or Physicians, Primary Care/ or General Practitioners/ or Primary Health Care/                                                                                                                                                                                                              |
| 2  | ((primary or "primary care" or family or general) adj2 (doctor* or physician* or practice* or practitioner* or medicine)) or "family health team*").mp.                                                                                                                                                                                                  |
| 3  | ((primary care or family practice or family health or family or general practice) adj2 nurs*).mp.                                                                                                                                                                                                                                                        |
| 4  | ("general practice clinic*" or "family practice clinic*" or "primary care clinic*" or "family clinic*" or "medical home").mp.                                                                                                                                                                                                                            |
| 5  | Family Nurse Practitioners/ or "family nurse practitioner*").mp.                                                                                                                                                                                                                                                                                         |
| 6  | exp psychiatry/ or psychology/                                                                                                                                                                                                                                                                                                                           |
| 7  | medical psychiatry.mp.                                                                                                                                                                                                                                                                                                                                   |
| 8  | mental health services/                                                                                                                                                                                                                                                                                                                                  |
| 9  | exp mental disorders/ or exp substance-related disorders/                                                                                                                                                                                                                                                                                                |
| 10 | child guidance/                                                                                                                                                                                                                                                                                                                                          |
| 11 | psychiatric nursing/                                                                                                                                                                                                                                                                                                                                     |
| 12 | community mental health services/                                                                                                                                                                                                                                                                                                                        |
| 13 | social work, psychiatric/                                                                                                                                                                                                                                                                                                                                |
| 14 | emergency services, psychiatric/                                                                                                                                                                                                                                                                                                                         |
| 15 | "Delivery of Health Care, Integrated"/ or Comprehensive Health Care/ or "Continuity of Patient Care"/ or Interprofessional Relations/ or Interdisciplinary Communication/ or exp Patient Care Planning/ or exp Patient Care Team/ or Cooperative Behavior/ or Case Management/ or Patient-centered Care/ or Patient Navigation/                          |
| 16 | (co-located or patient-centered or patient centred or patient centered).mp.                                                                                                                                                                                                                                                                              |
| 17 | ((clinical or critical or care or integrat\$ or collaborat* or comprehensive or stepped or psychosomatic or shared or "behavioral health" or interprofessional) adj4 (treat\$ or team* or care* or path*)).mp.                                                                                                                                           |
| 18 | ((coordinated or clinical or critical or care or integrat\$ or collaborat* or comprehensive or stepped or psychosomatic or shared or interprofessional) adj4 (treat* or team* or care or path* or managed or management or mental-health or mental health or psychosomatic or behavioural health or behavioral health or healthcare or health care)).mp. |

**# Search Term(s)**

- 1  
2  
3  
4  
5  
6  
7  
8  
9  
10  
11  
12  
13  
14  
15  
16  
17  
18  
19  
20  
21  
22  
23  
24  
25  
26  
27  
28  
29  
30  
31  
32  
33  
34  
35  
36  
37  
38  
39  
40  
41  
42  
43  
44  
45  
46  
47  
48  
49  
50  
51  
52  
53  
54  
55  
56  
57  
58  
59  
60
- 19 education/ or curriculum/ or competency-based education/ or interdisciplinary studies/ or "mainstreaming (education)"/ or problem-based learning/ or education, distance/ or education, premedical/ or education, professional/ or education, continuing/ or education, medical, continuing/ or education, nursing, continuing/ or education, pharmacy, continuing/ or education, professional, retraining/ or education, graduate/ or education, medical, graduate/ or education, nursing, graduate/ or education, pharmacy, graduate/ or education, medical/ or education, medical, undergraduate/ or "internship and residency"/ or teaching rounds/ or education, nursing/ or education, nursing, associate/ or education, nursing, baccalaureate/ or education, nursing, diploma programs/ or nursing education research/ or inservice training/ or staff development/ or schools, health occupations/ or schools, medical/ or schools, nursing/ or schools, pharmacy/ or teaching/ or computer user training/ or models, educational/ or programmed instruction as topic/ or computer-assisted instruction/ or remedial teaching/ or simulation training/ or patient simulation/ or training support/ or academic medical centers/ or hospitals, teaching/ or hospitals, university/ or education department, hospital/
- 20 (curricul\* or instruction or teach or "interprofessional education" or "continuing medical education" or "professional development").mp.
- 21 ((course\* or staff or program\*) adj2 train\*).mp.
- 22 (training adj3 (guide or guides or guideline\* or material\*)).mp.
- 23 ("on the job training" or "on-the-job training").mp.
- 24 or/1-5
- 25 or/6-14
- 26 or/15-18
- 27 or/19-23
- 28 and/24-27
- 29 limit 28 to english language

TABLE 2. Search Strategy for ERIC

| #  | Search term(s)                                                                                                                                                                                                                                                                                                                                                                                    |
|----|---------------------------------------------------------------------------------------------------------------------------------------------------------------------------------------------------------------------------------------------------------------------------------------------------------------------------------------------------------------------------------------------------|
| 1  | primary health care/ or "family practice (medicine)"/                                                                                                                                                                                                                                                                                                                                             |
| 2  | ((primary or "primary care" or family or general) adj (doctor* or physician* or practice* or practitioner* or medicine or "family health team*")).mp.                                                                                                                                                                                                                                             |
| 3  | ((primary care or family practice or family health or family or general practice) adj nurs*).mp.                                                                                                                                                                                                                                                                                                  |
| 4  | ("general practice clinic*" or "family practice clinic*" or "primary care clinic*" or "family clinic*" or "medical home").mp.                                                                                                                                                                                                                                                                     |
| 5  | "family nurse practitioner*".mp.                                                                                                                                                                                                                                                                                                                                                                  |
| 6  | mental disorders/ or exp anxiety disorders/ or exp dementia/ or exp emotional disturbances/ or exp neurosis/ or exp pervasive developmental disorders/ or exp psychosis/                                                                                                                                                                                                                          |
| 7  | behavior disorders/                                                                                                                                                                                                                                                                                                                                                                               |
| 8  | alcoholism/                                                                                                                                                                                                                                                                                                                                                                                       |
| 9  | substance abuse/ or exp alcohol abuse/ or exp drug abuse/                                                                                                                                                                                                                                                                                                                                         |
| 10 | psychiatric services/                                                                                                                                                                                                                                                                                                                                                                             |
| 11 | psychological services/                                                                                                                                                                                                                                                                                                                                                                           |
| 12 | mental health programs/                                                                                                                                                                                                                                                                                                                                                                           |
| 13 | psychiatry/                                                                                                                                                                                                                                                                                                                                                                                       |
| 14 | psychologists/                                                                                                                                                                                                                                                                                                                                                                                    |
| 15 | medical psychiatry.mp.                                                                                                                                                                                                                                                                                                                                                                            |
| 16 | interdisciplinary approach/ or interprofessional relationship/ or interpersonal relationship/ or teamwork/ or institutional cooperation/ or cooperation/                                                                                                                                                                                                                                          |
| 17 | (co-located or patient-centered patient-centred or patient centred or patient centered).mp.                                                                                                                                                                                                                                                                                                       |
| 18 | ((coordinated or clinical or critical or care or integrat* or collaborat* or comprehensive or stepped or psychosomatic or shared or interprofessional or behavioural health or behavioral health) adj (treat* or team* or care or path* or managed or management or mental-health or mental health or psychosomatic or behavioural health or behavioral health or healthcare or health care)).mp. |
| 19 | curriculum/                                                                                                                                                                                                                                                                                                                                                                                       |
| 20 | curriculum development/                                                                                                                                                                                                                                                                                                                                                                           |
| 21 | "clinical teaching (health professions)"/                                                                                                                                                                                                                                                                                                                                                         |
| 22 | professional development/                                                                                                                                                                                                                                                                                                                                                                         |
| 23 | staff development/                                                                                                                                                                                                                                                                                                                                                                                |
| 24 | capacity building/                                                                                                                                                                                                                                                                                                                                                                                |
| 25 | continuing education/ or professional continuing education/                                                                                                                                                                                                                                                                                                                                       |
| 26 | simulation/ or computer simulation/ or role playing/                                                                                                                                                                                                                                                                                                                                              |
| 27 | professional education/                                                                                                                                                                                                                                                                                                                                                                           |
| 28 | medical education/ or graduate medical education/ or nursing education/ or pharmaceutical education/ or allied health occupations education/                                                                                                                                                                                                                                                      |
| 29 | educational strategies/                                                                                                                                                                                                                                                                                                                                                                           |
| 30 | experiential learning/ or field experience programs/ or internship programs/                                                                                                                                                                                                                                                                                                                      |
| 31 | training methods/                                                                                                                                                                                                                                                                                                                                                                                 |

**# Search term(s)****32** on the job training/**33** instructional materials/ or textbooks/ or workbooks/**34** graduate medical education/**35** medical schools/**36** (curricul\* or instruction or teach or "interprofessional education" or "continuing medical education" or "professional development").mp.**37** ((course\* or staff or program\*) adj train\*).mp.**38** (training adj (guide or guides or guideline\* or material\*)).mp.**39** ("on the job training" or "on-the-job training").mp.**40** or/1-5**41** or/6-15**42** or/16-18**43** or/19-39**44** and/40-43**45** limit to english language

**TABLE 3. Search Strategy for Scopus****# Search term(s)**

- 1 TITLE-ABS-KEY ((( "family service\*" OR "family practice\*" OR "family practitioner\*" OR "family physician\*" OR "family doctor\*" OR "family nurse\*" OR "family team" OR "family teams" OR "family health" OR "family health care" OR "family healthcare" OR "family clinic\*" OR "family medicine" )) OR (( "general service\*" OR "general practice\*" OR "general practitioner\*" OR "general physician\*" OR "general doctor\*" OR "general nurse\*" OR "general team" OR "general teams" OR "general health" OR "general health care" OR "general healthcare" OR "general clinic\*" OR "general medicine" )) OR (( "primary care service\*" OR "primary care practice\*" OR "primary care practitioner\*" OR "primary care physician\*" OR "primary care doctor\*" OR "primary care nurse\*" OR "primary care team" OR "primary care teams" OR "primary care health" OR "primary care clinic\*" OR "primary care medicine" )) OR (( "primary service\*" OR "primary practice\*" OR "primary practitioner\*" OR "primary physician\*" OR "primary doctor\*" OR "primary nurse\*" OR "primary team" OR "primary teams" OR "primary health" OR "primary health care" OR "primary healthcare" OR "primary clinic\*" OR "primary medicine" )) OR (( "general practice service\*" OR "general practice physician\*" OR "general practice doctor\*" OR "general practice nurse\*" OR "general practice team" OR "general practice teams" OR "general practice health" OR "general practice health care" OR "general practice healthcare" OR "general practice clinic\*" OR "general practice medicine" )) OR (( "family practice service\*" OR "family practice physician\*" OR "family practice doctor\*" OR "family practice nurse\*" OR "family practice team" OR "family practice teams" OR "family practice health" OR "family practice health care" OR "family practice healthcare" OR "family practice clinic\*" OR "family practice medicine" )) OR (( "family health service\*" OR "family health physician\*" OR "family health doctor\*" OR "family health nurse\*" OR "family health team" OR "family health teams" OR "family health clinic\*" OR "family health medicine" ))))
- 2 TITLE-ABS-KEY ((( patient care OR patient-centered OR patient-centred OR patient centered OR patient centred OR coordinated OR clinical OR critical OR care OR integrat\* OR collaborat\* OR multidisciplinary OR comprehensive OR stepped OR psychosomatic OR shared OR behavioral health OR behavioural health OR interprofessional ) AND ( treat\* OR team\* OR care OR path\* OR managed OR management OR mental-health OR mental health OR psychosomatic OR behavioural health OR behavioral health OR healthcare OR health care OR health-care )))
- 3 TITLE-ABS-KEY (( psychiatr\* OR psycholog\* OR mental health OR mental disorder\* OR mental illness\* OR addiction OR alcoholi\* OR substance abuse\* OR substance-related disorder\* ))
- 4 TITLE-ABS-KEY ((( professional OR interprofessional OR continuing OR course\* OR staff OR program\* OR physician\* OR nurs\* OR simulation OR medical ) AND ( train\* OR education\* OR development )) OR ( training AND ( guide OR guides OR guideline\* OR material\* )) OR ( curricul\* OR instruction OR teach OR "continuing medical education" OR retrain\* OR inservice OR "on the job training" OR "on-the-job training" ))
- 5 #1 and #2 and #3 and #4

**TABLE 3. Search Strategy for Web of Science.** The following Indices were queried:

- Science Citation Index Expanded (SCI-EXPANDED) --1900-present
- Social Sciences Citation Index (SSCI) --1956-present
- Arts & Humanities Citation Index (A&HCI) --1975-present
- Conference Proceedings Citation Index- Science (CPCI-S) --1990-present
- Conference Proceedings Citation Index- Social Science & Humanities (CPCI-SSH) --1990-present
- Emerging Sources Citation Index (ESCI) --2015-present

**# Search term(s)**

- 1 TS=((family or general or "primary care" or primary or "general practice" or "family practice" or "family health") NEAR/2 (service\* or practice\* or practitioner\* or physician\* or doctor\* or nurs\* or team or teams or health or "health care" or healthcare or clinic\* or medicine))
- 2 TS=(psychiatr\* or psycholog\* or "mental health" or "mental disorder\*" or "mental illness\*" or addiction or alcoholi\* or "substance abuse\*" or "substance-related disorder\*")
- 3 TOPIC: (((("patient care" or "patient-centered" or "patient-centred" or "patient centered" or "patient centred" or coordinated or clinical or critical or care or integrat\$ or collaborat\* or multidisciplinary or comprehensive or stepped or psychosomatic or shared or "behavioral health" or "behavioural health" or interprofessional) NEAR/4 (treat\* or team\* or care or path\* or managed or management or mental-health or "mental health" or psychosomatic or "behavioural health" or "behavioral health" or healthcare or "health care" or "health-care"))))
- 4 TOPIC: ((curricul\* or instruction or teach or "continuing medical education" or retrain\* or inservice))
- 5 TOPIC: (((professional or interprofessional or continuing or course\* or staff or program\* or physician\* or nurs\* or simulation or medical) NEAR/2 (train\* or education\* or development)))
- 6 TOPIC: (training NEAR/3 (guide or guides or guideline\* or material\*))
- 7 TOPIC: (("on the job training" or "on-the-job training"))
- 8 #7 OR #6 OR #5 OR #4
- 9 (#8 AND #3 AND #2 AND #1) AND LANGUAGE: (English)
- 10 (WC=(psychology\* OR psychiatry OR primary health care OR emergency medicine)) OR (SU=(Life Sciences & Biomedicine OR Behavioral Sciences OR Critical Care Medicine OR Developmental Biology OR Emergency Medicine OR General & Internal Medicine OR Health Care Sciences & Services OR Social Work OR Integrative & Complementary Medicine OR Life Sciences Biomedicine Other Topics OR Neurosciences & Neurology OR Nursing OR Pharmacology & Pharmacy OR Psychiatry OR Research & Experimental Medicine OR Substance Abuse OR Psychology OR Social Work))
- 11 (WC=(Education & Educational Research or Education, Scientific Disciplines or Education, Special)) OR (SU=( Education & Educational Research))
- 12 #10 AND #9
- 13 #12 AND #11

# BMJ Open

## Scoping Review Protocol: Education Initiatives for Medical Psychiatry Collaborative Care

|                                 |                                                                                                                                                                                                                                                                                                                                                                                                                                                                                                                                                                                                                                                                                                                                                                                                                                                                                 |
|---------------------------------|---------------------------------------------------------------------------------------------------------------------------------------------------------------------------------------------------------------------------------------------------------------------------------------------------------------------------------------------------------------------------------------------------------------------------------------------------------------------------------------------------------------------------------------------------------------------------------------------------------------------------------------------------------------------------------------------------------------------------------------------------------------------------------------------------------------------------------------------------------------------------------|
| Journal:                        | <i>BMJ Open</i>                                                                                                                                                                                                                                                                                                                                                                                                                                                                                                                                                                                                                                                                                                                                                                                                                                                                 |
| Manuscript ID                   | bmjopen-2017-015886.R1                                                                                                                                                                                                                                                                                                                                                                                                                                                                                                                                                                                                                                                                                                                                                                                                                                                          |
| Article Type:                   | Protocol                                                                                                                                                                                                                                                                                                                                                                                                                                                                                                                                                                                                                                                                                                                                                                                                                                                                        |
| Date Submitted by the Author:   | 07-Jun-2017                                                                                                                                                                                                                                                                                                                                                                                                                                                                                                                                                                                                                                                                                                                                                                                                                                                                     |
| Complete List of Authors:       | Shen, Nelson; University of Toronto, Institute of Health Policy, Management and Evaluation; University Health Network<br>Sockalingam, Sanjeev; University of Toronto, Department of Psychiatry; University Health Network<br>Abi Jaoude, Alexxa; Centre for Addiction and Mental Health, Education<br>Bailey, Sharon; Centre for Addiction and Mental Health<br>Bernier, Thérèse; University of Toronto, Institute of Health Policy, Management and Evaluation<br>Freeland, Alison; Trillium Health Partners; University of Toronto, Department of Psychiatry<br>Hawa, Aceel; Centre for Addiction and Mental Health, Education<br>Hollenberg, Elisa; Centre for Addiction and Mental Health, Education<br>Woldemichael, Bethel; Centre for Addiction and Mental Health, Education<br>Wiljer, David; University Health Network; University of Toronto, Department of Psychiatry |
| <b>Primary Subject Heading</b>: | Medical education and training                                                                                                                                                                                                                                                                                                                                                                                                                                                                                                                                                                                                                                                                                                                                                                                                                                                  |
| Secondary Subject Heading:      | Mental health, Addiction                                                                                                                                                                                                                                                                                                                                                                                                                                                                                                                                                                                                                                                                                                                                                                                                                                                        |
| Keywords:                       | collaborative care, PRIMARY CARE, MENTAL HEALTH, Integrated Care, MEDICAL EDUCATION & TRAINING, PSYCHIATRY                                                                                                                                                                                                                                                                                                                                                                                                                                                                                                                                                                                                                                                                                                                                                                      |
|                                 |                                                                                                                                                                                                                                                                                                                                                                                                                                                                                                                                                                                                                                                                                                                                                                                                                                                                                 |

SCHOLARONE™  
Manuscripts

## TITLE:

Scoping Review Protocol: Education Initiatives for Medical Psychiatry Collaborative Care

## AUTHORS:

Nelson Shen<sup>1</sup>, Sanjeev Sockalingam<sup>2,3</sup>, Alexxa Abi Jaoude<sup>4</sup>, Sharon Bailey<sup>4</sup>, Thérèse Bernier<sup>1</sup>,  
Alison Freeland<sup>2,5</sup>, Aceel Hawa<sup>4</sup>, Elisa Hollenberg<sup>4</sup>, Bethel Woldemichael<sup>4</sup>, David Wiljer<sup>1,2,3</sup>

## Institutions:

<sup>1</sup> Institute of Health Policy, Management and Evaluation, University of Toronto, Toronto, Canada

<sup>2</sup> Department of Psychiatry, University of Toronto, Toronto, Canada

<sup>3</sup> Centre for Mental Health, University Health Network, Toronto, Canada

<sup>4</sup> Education, Centre for Addiction and Mental Health, Toronto, Canada

<sup>5</sup> Trillium Health Partners, Mississauga, Canada

## Corresponding Author:

David Wiljer, PhD

University Health Network

190 Elizabeth Street, Room #441

Toronto, Ontario

Canada

Phone: 416 340 4800 ext. 6322

Email: david.wiljer@uhn.ca

## ABSTRACT

### Introduction:

The collaborative care model is an approach providing care to those with mental health and addictions disorders in the primary care setting. There is a robust evidence base demonstrating its clinical and cost effectiveness in comparison to usual care; however, the transitioning to this new paradigm of care has been difficult. While there are efforts to train and prepare healthcare professionals, not much is known about the current state of collaborative care training programs. The objective of this scoping review is to understand how widespread these collaborative education initiatives are, how they are implemented, and their impacts.

### Methods and analysis:

The scoping review methodology uses the established review methodology by Arksey and O'Malley. The search strategy was developed by a medical librarian and will be applied eight different databases spanning multiple disciplines. A two-stage screening process consisting of a title and abstract scan and a full-text review will be used to determine the eligibility of articles. To be included, articles must report on an existing collaborative care education initiative for healthcare providers. All articles will be independently assessed for eligibility by pairs of reviewers and all eligible articles will be abstracted and charted in duplicate using a standardized form. The extracted data will undergo a 'narrative review' or a descriptive analysis of the contextual or process-oriented data and simple quantitative analysis using descriptive statistics.

### Ethics and dissemination:

Research ethics approval is not required for this scoping review. The results of this scoping review will inform the development of a collaborative care training initiative emerging from the Medical Psychiatry Alliance, a four-institution philanthropic partnership in Ontario, Canada.

1  
2  
3 The results will also be presented at relevant national and international conferences and  
4  
5 published in a peer-reviewed journal.  
6  
7

8 **Keywords:** Collaborative care; Primary care; Mental Health; Addictions; Psychiatry; Integrated  
9  
10 care; Education; Training  
11

12 **Strengths and Limitations:**  
13

- 14 • Strengths of this study include: novelty, timeliness, and the importance of the topic to the  
15 delivery of mental health and addiction care; use of an established scoping review  
16 methodology; consultation with an experienced medical librarian in developing a multi-  
17 disciplinary search strategy; and a rigorous study selection and data extraction processes  
18 carried out in tandem with validation from content experts.  
19
- 20 • A limitation of the review is the potential to miss relevant articles given that education is  
21 not always separated from the implementation of collaborative care; however, the  
22 reference lists of included articles, relevant literature reviews, and key reports will be  
23 hand-searched to identify articles missed by the search strategy. Another limitation of  
24 this review is that only materials written in English will be included and that programs  
25 from non-English speaking countries may not be represented. Lastly, studies will not be  
26 undergoing a formal quality assessment as this review aims to provide a snapshot of the  
27 landscape of collaborative care education initiatives by being inclusive of all types of  
28 information available.  
29  
30  
31  
32  
33  
34  
35  
36  
37  
38  
39  
40  
41  
42  
43  
44  
45  
46  
47  
48  
49  
50  
51  
52  
53  
54  
55  
56  
57  
58  
59  
60

**BACKGROUND:**

There is a growing disparity of unmet needs for mental health services[1,2] as the current supply of psychiatrists and current practice patterns create substantial barriers hindering access to psychiatric assessment and treatment[3–6]. In recent years, primary care has increasingly become the first contact point for those seeking mental health treatment[7,8]; however, individuals seeking care in these settings often receive sub-optimal care as providers are not properly equipped or trained to manage complex physical and mental health conditions[9]. The disconnect with mental health services contributes to the treatment gap, making it difficult for individuals to receive the proper care, especially for those with co-morbidity or multi-morbidity. This inattention may further exacerbate their condition or lead to premature death due to their physical health conditions[10–12]. Backed by a growing and robust evidence base, there is a case for integrating mental healthcare into the primary care setting through a collaborative care model. Several meta-analyses[13–17] have demonstrated that collaborative care models can be more effective in treating mental health disorders than usual care. The collaborative care model has also demonstrated its value by improving quality of life for co-morbid patients for no or modest additional cost[18].

Collaborative care is often used interchangeably with other terms (e.g., mental health integration, integrated care, integrated mental health) to describe a range of models of care that consist of healthcare professionals working in partnership in a primary care setting to deliver mental healthcare; however, the degree of integration of the two disciplines vary depending on model[19]. Recently, an American Psychiatric Association/American Psychosomatic Medicine (APA/APM) working group to provide clarity and a standardized evidence-based integrated care

1  
2  
3 model. Derived from the seminal research by Katon et al.[20] and Wagner’s Chronic Care  
4  
5 Model[21], the APA/APM Collaborative Care model[22] defines collaborative care as the  
6  
7  
8 provision of care that is: 1) team-driven, 2) population-focused, 3) measurement-guided, and 4)  
9  
10 evidence-based. The collaborative care team extends beyond the “physician as treatment team”  
11  
12 by including a multidisciplinary group of professionals (e.g., psychiatric nurse practitioner,  
13  
14 social worker, licensed counsellor or therapist, psychologist, or psychiatrist, care managers, and  
15  
16 office support staff) in providing and supporting care and implementing and revising the  
17  
18 treatment plan. The new definition was developed to support informed decision-making by  
19  
20 policy-makers, healthcare providers, service delivery organizations, the public, and to help  
21  
22 standardize future training in this area.  
23  
24  
25  
26  
27  
28

29  
30 Despite the increasing recognition and implementation of the collaborative care model, there  
31  
32 remain difficulties in implementation as there is a lack of adequately prepared workforce [23].  
33  
34 The transition from a traditional care delivery model is a challenge as there are many new  
35  
36 processes and systems-level differences between integrated behavioural health and traditional  
37  
38 primary care settings that new team members must navigate [24,25]. Many programs have been  
39  
40 developed and implemented to provide training to provide individuals with the necessary skills,  
41  
42 knowledge, competencies, and attitudes to support the collaborative model of care [23–25]. A  
43  
44 variety of training approaches have been implemented, including training by internal or external  
45  
46 experts, onsite or offsite sessions, onboarding processes for new employees, training manuals,  
47  
48 shadowing processes and peer mentoring[23,25]. However, there have been calls for increased  
49  
50 pre-licensure training to take the burden off of such workplace training programs that can be  
51  
52 expensive and resource-intensive[23]. Furthermore, a recent editorial[26] has identified the need  
53  
54  
55  
56  
57  
58  
59  
60

1  
2  
3 to move beyond competency-based training in integrated care and called for integration of  
4  
5 theoretical frameworks, namely adaptive expertise, to better prepare future health care  
6  
7 professionals for managing complexity within integrated care settings.  
8  
9

10  
11  
12 While there have been tremendous efforts in the development of the collaborative care model  
13  
14 and the training supports, not much is known about the current scope of integrated care  
15  
16 education, how it is delivered, to whom, in what contexts, the content of the training, and  
17  
18 whether it is effective. There is a need to collect all the knowledge and experiences from existing  
19  
20 training programs, to continually improve current process of these programs, and to support the  
21  
22 development of new programs. The objective of this scoping review is to gain an understanding  
23  
24 of the current landscape of integrated care education.  
25  
26  
27  
28  
29  
30  
31

## 32 **METHODS**

33  
34 This review is being conducted to inform the development of a collaborative care training  
35  
36 initiative emerging from the Medical Psychiatry Alliance, a four-institution, Ministry of Health  
37  
38 and Long-Term Care, and philanthropic partnership in Ontario, Canada. Various knowledge  
39  
40 synthesis approaches were considered for this review; however, the scoping review  
41  
42 methodology is most appropriate especially since the complex area of collaborative care  
43  
44 education has not been reviewed comprehensively before [27,28]. To the authors' knowledge,  
45  
46 there has been no prior attempt to establish a baseline of knowledge regarding collaborative care  
47  
48 education initiatives. Given this knowledge gap and that literature may be diffuse due to the  
49  
50 multidisciplinary nature of collaborative care, scoping reviews are ideal in taking stock of the  
51  
52 volume and nature of the literature [28]. Utilizing this form of knowledge synthesis allows for  
53  
54  
55  
56  
57  
58  
59  
60

1  
2  
3 the broad exploration of collaborative care education to map key concepts, evidence types, and  
4  
5 gaps in research in a defined field; furthermore, scoping review make use of a wide array of  
6  
7 knowledge exhibited through empirical research and anecdotal accounts [29–31].  
8  
9

10  
11  
12 The methodology for this review draws upon Arksey and O'Malley's seminal framework [29]  
13  
14 for scoping reviews as the foundation and more recent advancements to the methodology  
15  
16 [30,32]. As recommended by Colquhoun et al.[33] , this protocol follows the relevant aspects of  
17  
18 the Preferred Reporting Items for Systematic Review and Meta-Analysis Protocols (PRISMA-P)  
19  
20 guidelines[34] to ensure rigour in reporting the methodology in the interim while PRISMA  
21  
22 guidelines are developed for scoping reviews[35] . Scoping reviews share a similar process as  
23  
24 systematic reviews since they both are rigorous and transparent in identifying eligible literature  
25  
26 but are divergent in purpose as scoping reviews aim to map the body of literature rather than sum  
27  
28 up the best available research on a specific question [36]. Scoping reviews are often seen as a  
29  
30 precursor to systematic reviews as it allows researchers to determine the value and probable  
31  
32 scope of a full systematic review and meta-analysis [29,37,38].  
33  
34  
35  
36  
37  
38  
39  
40

### 41 **Stage 1: identifying the research question**

42  
43 The objective of this review is to understand the current state of collaborative care education  
44  
45 initiatives by identifying existing initiatives (e.g., training programs, interventions) reported in  
46  
47 both academic and grey literature. By identifying the past and current education initiatives, this  
48  
49 review seeks to establish a foundational understanding of how these programs were implemented  
50  
51 and glean the critical success factors and recommendations of these experiences. To meet these  
52  
53 objective, this review asks the following questions:  
54  
55  
56  
57  
58  
59  
60

- What educational interventions exist within integrated collaborative care programs in hospital, community, and primary care settings?
- What aspects of collaborative care are taught in the educational interventions?
- How well do the interventions incorporate the core collaborative care principles as outlined in the APA/APM document?
- How were the interventions delivered? What were the critical success factors and lessons learned?

While the primary focus of this review is to take an inventory of existing programs and their processes, this review will also provide a narrative view on the extent to which these initiatives have been evaluated and provide a descriptive review of the effectiveness of current efforts in educating the health professions about collaborative care. The review will ask “What aspects of collaborative care programs have been evaluated” and “What were the outcomes of the evaluations (e.g., user perceptions, attitudinal changes, changes in knowledge and competency, behaviour change, organizational and clinical impact)?”

### **Stage 2: identifying relevant studies**

The search strategy was iteratively developed by the research team in collaboration with an experienced medical librarian (SB) and implemented on July 2016 in eight electronic databases: Medline, Medline In-Process, PsycINFO, EMBASE, CINAHL, ERIC, Scopus, and ISI Web of Science. These databases were selected to capture a comprehensive sample of literature from health sciences, psychiatry, education, and other disciplines. The search query was first developed for Medline. Medline (Ovid) was selected as the first database to query because the

1  
2  
3 Ovid interface facilitates fine-tuning at a level that PubMed does not; moreover, an added  
4 advantage to using Medline is its use of the National Library of Medicine's controlled  
5 vocabulary, MeSH®, to index citations[39]. Any chance in missing articles from PubMed were  
6 reduced by searching Ovid Medline "In-Process & Other Non-Indexed Citation" database to  
7 capture the most recent literature possible. The Ovid interface is also a shared platform which  
8 allows for quicker translation and querying of other Ovid-based databases (Medline In-Process,  
9 PsycINFO, and EMBASE).  
10  
11  
12  
13  
14  
15  
16  
17  
18  
19  
20  
21

22 The search strategy consisted of subject headings, keywords and related terms for primary care,  
23 integrated care, education, and mental health services, personnel, and conditions. Depending on  
24 the database, some subject terms were "exploded" which allowed us to capture all relevant  
25 search topics under a given term (e.g., using "exp mental disorders/" in Medline will catch all  
26 possible mental health diagnoses and conditions). Terms and concepts were combined using  
27 Boolean logic and operators including adjacencies. The searches were limited to articles in  
28 English and published after 1995 – when the collaborative care model was first introduced  
29 [20,22]. The search terms were then translated for use in the other databases. Applying the same  
30 search string to ISI Web of Science (interdisciplinary) required some modifications and a  
31 different approach to reduce the noise in the results. Specifically, the research categories and  
32 subject area limiters were used to reduce the yield to a manageable volume while maintaining the  
33 specificity required for this review. The first 100 search results from each database were  
34 reviewed by the research team to ensure validity of the search strategy - see Additional File 1 for  
35 full strategy.  
36  
37  
38  
39  
40  
41  
42  
43  
44  
45  
46  
47  
48  
49  
50  
51  
52  
53  
54  
55  
56  
57  
58  
59  
60

1  
2  
3  
4  
5  
6 The results from the search were imported into Mendeley desktop reference manager where the  
7  
8 citations were collated and de-duplicated. The research team was granted access to the citations  
9  
10 and articles using the Mendeley web-based collaboration function. The citations were then  
11  
12 copied and pasted into a spreadsheet for use in the subsequent eligibility screening and charting  
13  
14 processes.  
15  
16

### 17 18 19 20 **Stage 3: study selection**

21  
22 A two-stage screening process consisting of a title and abstract scan and a full-text review will be  
23  
24 used to determine the eligibility of articles. Both stages will follow the same process, where  
25  
26 every article will be independently reviewed in pairs and the results will be documented on the  
27  
28 spreadsheet. At the end of each round, the ratings will be compared and resolved by the two  
29  
30 reviewers or a third reviewer when consensus is not achieved. Any ambiguities regarding the  
31  
32 eligibility of a citation (or article) will be flagged and discussed.  
33  
34  
35  
36  
37  
38

39 The citations will be assessed for relevance based on a title and abstract scan. To be relevant for  
40  
41 full-text review, the title and abstract must: focus on providers from different specialities,  
42  
43 disciplines, or sectors working together to offer complementary services or support in delivering  
44  
45 care; be about delivering mental health and addictions care; and describe an existing education  
46  
47 intervention. This review is inclusive of all types of papers, thus including empirical studies, case  
48  
49 studies, and commentary articles; however, articles that were viewpoints on how education  
50  
51 programs should be implemented outside of the context of an existing program were excluded.  
52  
53  
54  
55  
56  
57  
58  
59  
60

1  
2  
3 The criteria will be piloted by the reviewers to refine and establish a common understanding of  
4 the inclusion criteria. After a training session, 20% of the Medline citations will be  
5  
6 independently reviewed by four reviewers to establish inter-rater reliability (IRR). The results of  
7  
8 the review will be compared and the interrater reliability will be calculated. The threshold for  
9  
10 IRR is set at an average Cohen's K of 0.70 indicating substantial agreement[40]. The pilot will  
11  
12 be run again if the threshold was not met. If met, the remaining articles will then be divided and  
13  
14 assigned to two sets of pairs for independent review. These adjustments to the inclusion  
15  
16 exclusion process are appropriate as they provide the team with opportunities to become familiar  
17  
18 with the data and to reduce workload [30,32]. This protocol made an additional adjustment by  
19  
20 adding the IRR to establish agreement between reviewers and provide more context to the study  
21  
22 selection process. Regardless of the IRR outcome, a meeting about the process will be held to  
23  
24 compare the results, resolve the disagreements, and troubleshoot the challenges that arose during  
25  
26 the title-abstract review process.  
27  
28  
29  
30  
31  
32  
33  
34  
35

36 Relevant articles identified in the title and abstract scan will undergo a full-text review to  
37  
38 confirm the articles eligibility for the review. The full-text review follows the same process as  
39  
40 the title and abstract scan. To be included, the article must be about a collaborative care  
41  
42 education initiative for healthcare providers. The full-text review form asked reviewers to assess  
43  
44 each article using the following questions:  
45  
46  
47

- 48 1. Does the article describe/discuss the provision of care related to mental health in a  
49 primary care setting?  
50
- 51 2. Does the article describe an education intervention/program?  
52
- 53 3. Does the education intervention focus on delivering team-based care?  
54  
55  
56  
57  
58  
59  
60

#### Step 4: charting the data

A standardized charting form will be developed by the research team to allow the investigators to categorize or ‘chart’ the data. The high-level domains for the charting form consist of article details, study details (if applicable), initiative details, and implementation factors. The specifics of each domain are outlined in Table 1. There will be a training session to trial the charting form and ensure there is a common understanding of the categories and how to use the form. The full-text reviewers will be asked if there are any additional variables emerging from the full-text review to consider for charting. The form will be piloted on five to ten articles by the team. This will consist of independent charting by the reviewers and validation by the senior investigators. A final round of feedback on the form will be solicited prior to the charting process. The charting will also consist of independent charting by the reviewers and validation by the senior investigators. The charters will be encouraged to provide constant feedback on emerging themes not captured in the charting form. The form will be revised as required.

Table 1. Data charting domains and elaboration of sub-domains.

| Domain/<br>Sub-Domains               | Description                                                                               |
|--------------------------------------|-------------------------------------------------------------------------------------------|
| <b>Article details</b>               |                                                                                           |
| Article type                         | Is the article an empirical study, case study, or commentary?                             |
| Year                                 | Article Year                                                                              |
| Country                              | Which country is this article from?                                                       |
| <b>Study details (if applicable)</b> |                                                                                           |
| Study design                         | If it is an empirical article, what was the study design? Report as described by authors. |
| Participants                         | Who were the study participants?                                                          |
| Intervention                         | What was the intervention? Report as described by the author.                             |
| Comparator                           | What was the comparator (if applicable)?                                                  |
| Study outcomes                       | What did the authors identify as the study outcomes?                                      |
| Outcomes                             | What were the main results of the study?                                                  |
| <b>Initiative details</b>            |                                                                                           |

1  
2  
3  
4  
5  
6  
7  
8  
9  
10  
11  
12  
13  
14  
15  
16  
17  
18  
19  
20  
21  
22  
23  
24  
25  
26  
27  
28  
29  
30  
31  
32  
33  
34  
35  
36  
37  
38  
39  
40  
41  
42  
43  
44  
45  
46  
47  
48  
49  
50  
51  
52  
53  
54  
55  
56  
57  
58  
59  
60

|                  |                                                                                      |
|------------------|--------------------------------------------------------------------------------------|
| Name             | What is the name of the program (if applicable)?                                     |
| Setting          | Where does the education program take place? (e.g., community, hospital, university) |
| Participants     | Who were the participants of the program?                                            |
| Program delivery | How is the program delivered? (e.g., seminar, lecture, course, in-service training). |
| Instructors      | Who are the facilitators/instructors?                                                |
| Program length   | How long was the program/intervention?                                               |

#### *APA/APM Principles*[22]

1. *Team Driven* Does the program teach a team-based approach of multi-professionals to provide and support care and monitor treatment plans?
2. *Specific population* Does the program focus on the provision of care and health outcomes of a defined population of patients?
3. *Measurement* Does the program focus on systematic, disease-specific, patient-reported outcome measures (e.g., symptom rating scales) to drive clinical decision-making?
4. *Evidence based* Does the program focus on the application of proven treatments within an individual clinical context to achieve MBC outcomes?

#### **Implementation factors**

|                 |                                                                    |
|-----------------|--------------------------------------------------------------------|
| Success         | How did the authors define program success?                        |
| Enablers        | What factors that contributed to the success of the program?       |
| Barriers        | What factors may have detracted from the success of the program?   |
| Recommendations | What were the author's recommendations based on their experiences? |

### **Stage 5: collating, summarizing, and reporting the results**

The data will undergo a 'narrative review' or a descriptive analysis of the contextual or process-oriented data. The extracted data will also undergo simple quantitative analysis using descriptive statistics (e.g., frequencies, central tendency measures) to provide numerical summaries of the education initiatives and article or study characteristics[29]. The articles will not be assessed for quality as it is outside the scope of this review; however, details of the included articles will be reported in a summary table to provide context of the maturity of the evidence. Details of the education initiatives will also be summarized in a table. Learner and clinical outcomes reported in the studies will be classified based on the Kirkpatrick-Barr framework[41] for interprofessional learner outcomes. This framework was selected because of its focus on

1  
2  
3 interprofessional collaboration which can be applicable to the multi-disciplinary setting. The  
4  
5 framework consists of the following outcome typology:  
6  
7

- 8 • Level 1: learners' reaction—participant views of the learning experience and satisfaction  
9 with the program;
- 10 • Level 2a: modification of attitudes/perceptions—changes in reciprocal attitudes or  
11 perceptions between participant groups, toward patients/clients and their condition,  
12 circumstances, care, and treatment;
- 13 • Level 2b: acquisition of knowledge/skills—changes in knowledge and skills;
- 14 • Level 3: change in behavior—changes in behavior transferred from the learning  
15 environment to the workplace;
- 16 • Level 4a: change in organizational practice—changes in the organization or delivery of  
17 care attributable to an education program;
- 18 • Level 4b: benefits to patients/clients—improvements in the health and well-being of  
19 patients/clients as a direct result of an education program.

20  
21  
22 Depending on the number of studies, a table summary of program evaluations will also be  
23 reported. Lastly, the data for implementation factors sub-domains will undergo a thematic  
24 analysis to be examined for similarities, patterns, differences, and outliers.  
25  
26  
27

## 28 **ETHICS/DISSEMINATION**

29  
30 This protocol reports a comprehensive, rigorous, and transparent methodology. This review  
31 contributes of the advancement of research on this subject and comment on the maturity of the  
32 body of literature by identifying gaps in knowledge and research. Through the publication of the  
33  
34  
35  
36  
37  
38

1  
2  
3 results and dissemination at relevant conferences, the results of this review could guide the  
4  
5 direction of future research. The results from this review may inform the design of new  
6  
7 initiatives and the policies which support them; moreover, future implementations can learn from  
8  
9 the experience of others to avoid potential barriers and focus on enablers to increase the chances  
10  
11 of success of their programs – existing or new.  
12  
13

14  
15  
16  
17 **Acknowledgements:** The authors' work is supported in part by the Medical Psychiatry Alliance,  
18  
19 a collaborative health partnership of the University of Toronto, the Centre for Addiction and  
20  
21 Mental Health, the Hospital for Sick Children, Trillium Health Partners, the Ontario Ministry of  
22  
23 Health and Long-Term Care, and an anonymous donor.  
24  
25

26  
27 **Authors' contributions:** NS led the design and conceptualization of this work and drafted the  
28  
29 protocol. AA, TB, AH, EH, BW were involved in the conceptualization of the review design,  
30  
31 specifically in establishing the inclusion and exclusion criteria. EH and BW drafted the  
32  
33 background section of the protocol and provided feedback on the methodology and the  
34  
35 manuscript. SB developed the search strategy, conducted the search, provided feedback on the  
36  
37 manuscript, and copy-edited the manuscript. AF, SS, and DW provided guidance to the  
38  
39 conceptualization and design of the study, data analyses, and have revised all drafts of this  
40  
41 manuscript for important intellectual content and clarity. All authors give approval to the  
42  
43 publishing of this protocol manuscript.  
44  
45  
46

47  
48 **Competing interests:** The authors declare that they have no competing interests.  
49

50  
51 **Funding:** Not applicable  
52  
53  
54  
55  
56  
57  
58  
59  
60

## REFERENCES

- 1 Roll JM, Kennedy J, Tran M, *et al.* Disparities in unmet need for mental health services in the United States, 1997-2010. *Psychiatr Serv* 2013;**64**:80–2.  
doi:10.1176/appi.ps.201200071
- 2 Sunderland A, Findlay LC. Perceived need for mental health care in Canada: Results from the 2012 Canadian community health survey – mental health. *Heal Reports* 2013;**24**:3–9.  
doi:82-003-X
- 3 Goldner EM, Jones W, Fang ML. Access to and waiting time for psychiatrist services in a Canadian urban area: A study in real time. *Can J Psychiatry* 2011;**56**:474–80.  
doi:10.1177/070674371105600805
- 4 Bishop TF, Press MJ, Keyhani S, *et al.* Acceptance of insurance by psychiatrists and the implications for access to mental health care. *JAMA psychiatry* 2014;**71**:176–81.  
doi:10.1001/jamapsychiatry.2013.2862
- 5 Kurdyak P, Zaheer J, Cheng J, *et al.* Changes in Characteristics and Practice Patterns of Ontario Psychiatrists. *Can J Psychiatry* 2016;:706743716661325.  
doi:10.1177/0706743716661325
- 6 Cunningham PJ. Beyond parity: primary care physicians' perspectives on access to mental health care. *Health Aff (Millwood)* 2009;**28**:w490-501. doi:10.1377/hlthaff.28.3.w490
- 7 Wang PS, Lane M, Olfson M, *et al.* Twelve-Month Use of Mental Health Services in the United States. *Arch Gen Psychiatry* 2005;**62**:629. doi:10.1001/archpsyc.62.6.629
- 8 Wang PS, Demler O, Olfson M, *et al.* Changing profiles of service sectors used for mental health care in the United States. *Am J Psychiatry* 2006;**163**:1187–98.  
doi:10.1176/appi.ajp.163.7.1187

- 1  
2  
3 9 Knickman J, Krishnan R, Pincus H. Improving Access to Effective Care for People With  
4 Mental Health and Substance Use Disorders. *Jama* Published Online First: 2016.  
5  
6  
7  
8 doi:10.1001/jama.2016.13639  
9
- 10 10 Ivbijaro GO, Enum Y, Khan AA, *et al.* Collaborative care: models for treatment of  
11 patients with complex medical-psychiatric conditions. *Curr Psychiatry Rep* 2014;**16**:506.  
12  
13  
14  
15 doi:10.1007/s11920-014-0506-4  
16
- 17 11 Patel V, Belkin GS, Chockalingam A, *et al.* Grand Challenges: Integrating Mental Health  
18 Services into Priority Health Care Platforms. *PLoS Med* 2013;**10**.  
19  
20  
21  
22  
23  
24  
25  
26  
27  
28  
29  
30  
31  
32  
33  
34  
35  
36  
37  
38  
39  
40  
41  
42  
43  
44  
45  
46  
47  
48  
49  
50  
51  
52  
53  
54  
55  
56  
57  
58  
59  
60
- 12 12 Walker ER, McGee RE, Druss BG. Mortality in Mental Disorders and Global Disease  
Burden Implications. *JAMA Psychiatry* 2015;**72**:334–41.  
doi:10.1001/jamapsychiatry.2014.2502
- 13 13 Gilbody S. Collaborative Care for Depression. *Arch Intern Med* 2006;**166**:2314.  
doi:10.1001/archinte.166.21.2314
- 14 14 Thota AB, Sipe TA, Byard GJ, *et al.* Collaborative care to improve the management of  
depressive disorders: A community guide systematic review and meta-analysis. *Am J Prev  
Med* 2012;**42**:525–38. doi:10.1016/j.amepre.2012.01.019
- 15 15 Archer J, Bower P, Gilbody S, *et al.* Collaborative care for depression and anxiety  
problems. *Cochrane Database Syst Rev* 2012;**10**:CD006525.  
doi:10.1002/14651858.CD006525.pub2
- 16 16 Coventry PA, Hudson JL, Kontopantelis E, *et al.* Characteristics of effective collaborative  
care for treatment of depression: A systematic review and meta-regression of 74  
randomised controlled trials. *PLoS One* 2014;**9**. doi:10.1371/journal.pone.0108114

- 1  
2  
3  
4  
5  
6  
7  
8  
9  
10  
11  
12  
13  
14  
15  
16  
17  
18  
19  
20  
21  
22  
23  
24  
25  
26  
27  
28  
29  
30  
31  
32  
33  
34  
35  
36  
37  
38  
39  
40  
41  
42  
43  
44  
45  
46  
47  
48  
49  
50  
51  
52  
53  
54  
55  
56  
57  
58  
59  
60
- 17 Panagioti M, Bower P, Kontopantelis E, *et al.* Association Between Chronic Physical Conditions and the Effectiveness of Collaborative Care for Depression. *JAMA Psychiatry* 2016;**73**:978. doi:10.1001/jamapsychiatry.2016.1794
- 18 Katon W, Russo J, Lin EHB, *et al.* Cost-effectiveness of a multicondition collaborative care intervention: a randomized controlled trial. *Arch Gen Psychiatry* 2012;**69**:506–14. doi:10.1001/archgenpsychiatry.2011.1548
- 19 Kwan BM, Nease DE. The State of the Evidence for Integrated Behavioral Health in Primary Care. In: *Integrated Behavioral Health in Primary Care*. New York, NY: : Springer New York 2013. 65–98. doi:10.1007/978-1-4614-6889-9\_5
- 20 Katon W. Collaborative care: Patient satisfaction, outcomes, and medical cost-offset. *Fam Syst Med* 1995;**13**:351–65. doi:10.1037/h0089387
- 21 Wagner EH. Meeting the needs of chronically ill people. *BMJ* 2001;**323**:945–6. doi:10.1136/bmj.323.7319.945
- 22 American Psychiatric Association, Academy of Psychosomatic Medicine. Dissemination of Integrated Care Within Adult Primary Care Settings: The Collaborative Care Model. 2016.
- 23 Hall J, Cohen DJ, Davis M, *et al.* Preparing the Workforce for Behavioral Health and Primary Care Integration. *J Am Board Fam Med* 2015;**28 Suppl 1**:S41-51.
- 24 Ratzliff A, Norfleet K, Chan Y-F, *et al.* Perceived Educational Needs of the Integrated Care Psychiatric Consultant. *Acad Psychiatry* 2015;**39**:448–56.
- 25 Dickinson WP. Strategies to Support the Integration of Behavioral Health and Primary Care: What Have We Learned Thus Far?. *J Am Board Fam Med* 2015;**28 Suppl 1**:S102-6.
- 26 Sockalingam S, Mulsant BH, Mylopoulos M. Beyond integrated care competencies: The

- 1  
2  
3 imperative for adaptive expertise. *Gen Hosp Psychiatry* 2016;**43**:30–1.  
4  
5 doi:10.1016/j.genhosppsy.2016.09.002  
6  
7  
8 27 Mays N, Roberts E, Popay J. Synthesising research evidence. In: *Studying the*  
9  
10 *organisation and delivery of health services: Research methods*. 2001. 188–220.  
11  
12  
13 28 Wilson M, Lavis J, Guta A. Community-based organizations in the health sector: A  
14  
15 scoping review. *Heal Res Policy Syst* 2012;**10**:36. doi:10.1186/1478-4505-10-36  
16  
17  
18 29 Arksey H, O'Malley L. Scoping studies: towards a methodological framework. *Int J Soc*  
19  
20 *Res Methodol* 2005;**8**:19–32. doi:10.1080/1364557032000119616  
21  
22  
23 30 Levac D, Colquhoun H, O'Brien KK. Scoping studies: advancing the methodology.  
24  
25 *Implement Sci* 2010;**5**:69. doi:10.1186/1748-5908-5-69  
26  
27  
28 31 Colquhoun HL, Levac D, O'Brien KK, *et al*. Scoping reviews: Time for clarity in  
29  
30 definition, methods, and reporting. *J Clin Epidemiol* 2014;**67**:1291–4.  
31  
32 doi:10.1016/j.jclinepi.2014.03.013  
33  
34  
35 32 Daudt HML, van Mossel C, Scott SJ. Enhancing the scoping study methodology: a large,  
36  
37 inter-professional team's experience with Arksey and O'Malley's framework. *BMC Med*  
38  
39 *Res Methodol* 2013;**13**:48. doi:10.1186/1471-2288-13-48  
40  
41  
42 33 Colquhoun H. Current Best Practices for the Conduct of Scoping Reviews. EQUATOR  
43  
44 Netw. 2016.[http://www.equator-network.org/wp-content/uploads/2016/06/Gerstein-](http://www.equator-network.org/wp-content/uploads/2016/06/Gerstein-Library-scoping-reviews_May-12.pdf)  
45  
46 [Library-scoping-reviews\\_May-12.pdf](http://www.equator-network.org/wp-content/uploads/2016/06/Gerstein-Library-scoping-reviews_May-12.pdf) (accessed 20 May2017).  
47  
48  
49 34 Shamseer L, Moher D, Clarke M, *et al*. Preferred reporting items for systematic review  
50  
51 and meta-analysis protocols (PRISMA-P) 2015: elaboration and explanation. *BMJ*  
52  
53 2015;**349**:g7647–g7647. doi:10.1136/bmj.g7647  
54  
55  
56 35 Tricco A, Straus S, Moher D. Preferred Reporting Items for Systematic Reviews and  
57  
58  
59  
60

- 1  
2  
3  
4  
5  
6  
7  
8  
9  
10  
11  
12  
13  
14  
15  
16  
17  
18  
19  
20  
21  
22  
23  
24  
25  
26  
27  
28  
29  
30  
31  
32  
33  
34  
35  
36  
37  
38  
39  
40  
41  
42  
43  
44  
45  
46  
47  
48  
49  
50  
51  
52  
53  
54  
55  
56  
57  
58  
59  
60
- Meta-Analysis: extension for Scoping Reviews (PRISMA-ScR). EQUATOR Netw.  
[http://www.equator-network.org/wp-content/uploads/2009/02/Executive-summary\\_ScR\\_Dec-9.pdf](http://www.equator-network.org/wp-content/uploads/2009/02/Executive-summary_ScR_Dec-9.pdf) (accessed 20 May2017).
- 36 Pham MT, Rajić A, Greig JD, *et al.* A scoping review of scoping reviews: Advancing the approach and enhancing the consistency. *Res Synth Methods* 2014;**5**:371–85.  
doi:10.1002/jrsm.1123
- 37 The Joanna Briggs Institute. *Methodology for JBI Scoping reviews*. Joanna Briggs Insitute 2015.
- 38 Peters MDJ, Godfrey CM, Khalil H, *et al.* Guidance for conducting systematic scoping reviews. *Int J Evid Based Healthc* 2015;**13**:141–6. doi:10.1097/XEB.0000000000000050
- 39 U.S. National Library of Medicine. Fact Sheet - MEDLINE, PubMed, and PMC (PubMed Central): How are they different?  
2017.[https://www.nlm.nih.gov/pubs/factsheets/dif\\_med\\_pub.html](https://www.nlm.nih.gov/pubs/factsheets/dif_med_pub.html) (accessed 20 May2017).
- 40 Landis JR, Koch GG. The measurement of observer agreement for categorical data. *Biometrics* 1977;**33**:159–74.
- 41 Barr H, Freeth D, Hammick M, *et al.* Evaluations of interprofessional education. London: 2000.

## Appendix A – Scoping Review Search Strategy

**Table 1. Search strategy for MEDLINE, MEDLINE In-Progress, PsycINFO, EMBASE, and CINAHL.**

NB: Only MEDLINE search strategy included. The search strategies for the other databases were similar in structure with similar search terms and synonyms. Contact the corresponding author for the full search strategy for each database.

| #  | Search Term(s)                                                                                                                                                                                                                                                                                                                                           |
|----|----------------------------------------------------------------------------------------------------------------------------------------------------------------------------------------------------------------------------------------------------------------------------------------------------------------------------------------------------------|
| 1  | Family Practice/ or General Practice/ or Physicians, Family/ or Physicians, Primary Care/ or General Practitioners/ or Primary Health Care/                                                                                                                                                                                                              |
| 2  | ((primary or "primary care" or family or general) adj2 (doctor* or physician* or practice* or practitioner* or medicine)) or "family health team*").mp.                                                                                                                                                                                                  |
| 3  | ((primary care or family practice or family health or family or general practice) adj2 nurs*).mp.                                                                                                                                                                                                                                                        |
| 4  | ("general practice clinic*" or "family practice clinic*" or "primary care clinic*" or "family clinic*" or "medical home").mp.                                                                                                                                                                                                                            |
| 5  | Family Nurse Practitioners/ or "family nurse practitioner* ".mp.                                                                                                                                                                                                                                                                                         |
| 6  | exp psychiatry/ or psychology/                                                                                                                                                                                                                                                                                                                           |
| 7  | medical psychiatry.mp.                                                                                                                                                                                                                                                                                                                                   |
| 8  | mental health services/                                                                                                                                                                                                                                                                                                                                  |
| 9  | exp mental disorders/ or exp substance-related disorders/                                                                                                                                                                                                                                                                                                |
| 10 | child guidance/                                                                                                                                                                                                                                                                                                                                          |
| 11 | psychiatric nursing/                                                                                                                                                                                                                                                                                                                                     |
| 12 | community mental health services/                                                                                                                                                                                                                                                                                                                        |
| 13 | social work, psychiatric/                                                                                                                                                                                                                                                                                                                                |
| 14 | emergency services, psychiatric/                                                                                                                                                                                                                                                                                                                         |
| 15 | "Delivery of Health Care, Integrated"/ or Comprehensive Health Care/ or "Continuity of Patient Care"/ or Interprofessional Relations/ or Interdisciplinary Communication/ or exp Patient Care Planning/ or exp Patient Care Team/ or Cooperative Behavior/ or Case Management/ or Patient-centered Care/ or Patient Navigation/                          |
| 16 | (co-located or patient-centered or patient centred or patient centered).mp.                                                                                                                                                                                                                                                                              |
| 17 | ((clinical or critical or care or integrat\$ or collaborat* or comprehensive or stepped or psychosomatic or shared or "behavioral health" or interprofessional) adj4 (treat\$ or team* or care* or path*)).mp.                                                                                                                                           |
| 18 | ((coordinated or clinical or critical or care or integrat\$ or collaborat* or comprehensive or stepped or psychosomatic or shared or interprofessional) adj4 (treat* or team* or care or path* or managed or management or mental-health or mental health or psychosomatic or behavioural health or behavioral health or healthcare or health care)).mp. |

**# Search Term(s)**

- 1  
2  
3  
4  
5  
6  
7  
8  
9  
10  
11  
12  
13  
14  
15  
16  
17  
18  
19  
20  
21  
22  
23  
24  
25  
26  
27  
28  
29  
30  
31  
32  
33  
34  
35  
36  
37  
38  
39  
40  
41  
42  
43  
44  
45  
46  
47  
48  
49  
50  
51  
52  
53  
54  
55  
56  
57  
58  
59  
60
- 19 education/ or curriculum/ or competency-based education/ or interdisciplinary studies/ or "mainstreaming (education)"/ or problem-based learning/ or education, distance/ or education, premedical/ or education, professional/ or education, continuing/ or education, medical, continuing/ or education, nursing, continuing/ or education, pharmacy, continuing/ or education, professional, retraining/ or education, graduate/ or education, medical, graduate/ or education, nursing, graduate/ or education, pharmacy, graduate/ or education, medical/ or education, medical, undergraduate/ or "internship and residency"/ or teaching rounds/ or education, nursing/ or education, nursing, associate/ or education, nursing, baccalaureate/ or education, nursing, diploma programs/ or nursing education research/ or inservice training/ or staff development/ or schools, health occupations/ or schools, medical/ or schools, nursing/ or schools, pharmacy/ or teaching/ or computer user training/ or models, educational/ or programmed instruction as topic/ or computer-assisted instruction/ or remedial teaching/ or simulation training/ or patient simulation/ or training support/ or academic medical centers/ or hospitals, teaching/ or hospitals, university/ or education department, hospital/
- 20 (curricul\* or instruction or teach or "interprofessional education" or "continuing medical education" or "professional development").mp.
- 21 ((course\* or staff or program\*) adj2 train\*).mp.
- 22 (training adj3 (guide or guides or guideline\* or material\*)).mp.
- 23 ("on the job training" or "on-the-job training").mp.
- 24 or/1-5
- 25 or/6-14
- 26 or/15-18
- 27 or/19-23
- 28 and/24-27
- 29 limit 28 to english language

TABLE 2. Search Strategy for ERIC

| #  | Search term(s)                                                                                                                                                                                                                                                                                                                                                                                    |
|----|---------------------------------------------------------------------------------------------------------------------------------------------------------------------------------------------------------------------------------------------------------------------------------------------------------------------------------------------------------------------------------------------------|
| 1  | primary health care/ or "family practice (medicine)"/                                                                                                                                                                                                                                                                                                                                             |
| 2  | ((primary or "primary care" or family or general) adj (doctor* or physician* or practice* or practitioner* or medicine or "family health team*")).mp.                                                                                                                                                                                                                                             |
| 3  | ((primary care or family practice or family health or family or general practice) adj nurs*).mp.                                                                                                                                                                                                                                                                                                  |
| 4  | ("general practice clinic*" or "family practice clinic*" or "primary care clinic*" or "family clinic*" or "medical home").mp.                                                                                                                                                                                                                                                                     |
| 5  | "family nurse practitioner*".mp.                                                                                                                                                                                                                                                                                                                                                                  |
| 6  | mental disorders/ or exp anxiety disorders/ or exp dementia/ or exp emotional disturbances/ or exp neurosis/ or exp pervasive developmental disorders/ or exp psychosis/                                                                                                                                                                                                                          |
| 7  | behavior disorders/                                                                                                                                                                                                                                                                                                                                                                               |
| 8  | alcoholism/                                                                                                                                                                                                                                                                                                                                                                                       |
| 9  | substance abuse/ or exp alcohol abuse/ or exp drug abuse/                                                                                                                                                                                                                                                                                                                                         |
| 10 | psychiatric services/                                                                                                                                                                                                                                                                                                                                                                             |
| 11 | psychological services/                                                                                                                                                                                                                                                                                                                                                                           |
| 12 | mental health programs/                                                                                                                                                                                                                                                                                                                                                                           |
| 13 | psychiatry/                                                                                                                                                                                                                                                                                                                                                                                       |
| 14 | psychologists/                                                                                                                                                                                                                                                                                                                                                                                    |
| 15 | medical psychiatry.mp.                                                                                                                                                                                                                                                                                                                                                                            |
| 16 | interdisciplinary approach/ or interprofessional relationship/ or interpersonal relationship/ or teamwork/ or institutional cooperation/ or cooperation/                                                                                                                                                                                                                                          |
| 17 | (co-located or patient-centered patient-centred or patient centred or patient centered).mp.                                                                                                                                                                                                                                                                                                       |
| 18 | ((coordinated or clinical or critical or care or integrat* or collaborat* or comprehensive or stepped or psychosomatic or shared or interprofessional or behavioural health or behavioral health) adj (treat* or team* or care or path* or managed or management or mental-health or mental health or psychosomatic or behavioural health or behavioral health or healthcare or health care)).mp. |
| 19 | curriculum/                                                                                                                                                                                                                                                                                                                                                                                       |
| 20 | curriculum development/                                                                                                                                                                                                                                                                                                                                                                           |
| 21 | "clinical teaching (health professions)"/                                                                                                                                                                                                                                                                                                                                                         |
| 22 | professional development/                                                                                                                                                                                                                                                                                                                                                                         |
| 23 | staff development/                                                                                                                                                                                                                                                                                                                                                                                |
| 24 | capacity building/                                                                                                                                                                                                                                                                                                                                                                                |
| 25 | continuing education/ or professional continuing education/                                                                                                                                                                                                                                                                                                                                       |
| 26 | simulation/ or computer simulation/ or role playing/                                                                                                                                                                                                                                                                                                                                              |
| 27 | professional education/                                                                                                                                                                                                                                                                                                                                                                           |
| 28 | medical education/ or graduate medical education/ or nursing education/ or pharmaceutical education/ or allied health occupations education/                                                                                                                                                                                                                                                      |
| 29 | educational strategies/                                                                                                                                                                                                                                                                                                                                                                           |
| 30 | experiential learning/ or field experience programs/ or internship programs/                                                                                                                                                                                                                                                                                                                      |
| 31 | training methods/                                                                                                                                                                                                                                                                                                                                                                                 |

**# Search term(s)**

- 1  
2  
3  
4  
5  
6  
7  
8  
9  
10  
11  
12  
13  
14  
15  
16  
17  
18  
19  
20  
21  
22  
23  
24  
25  
26  
27  
28  
29  
30  
31  
32  
33  
34  
35  
36  
37  
38  
39  
40  
41  
42  
43  
44  
45  
46  
47  
48  
49  
50  
51  
52  
53  
54  
55  
56  
57  
58  
59  
60
- 32** on the job training/
  - 33** instructional materials/ or textbooks/ or workbooks/
  - 34** graduate medical education/
  - 35** medical schools/
  - 36** (curricul\* or instruction or teach or "interprofessional education" or "continuing medical education" or "professional development").mp.
  - 37** ((course\* or staff or program\*) adj train\*).mp.
  - 38** (training adj (guide or guides or guideline\* or material\*)).mp.
  - 39** ("on the job training" or "on-the-job training").mp.
  - 40** or/1-5
  - 41** or/6-15
  - 42** or/16-18
  - 43** or/19-39
  - 44** and/40-43
  - 45** limit to english language

**TABLE 3. Search Strategy for Scopus****# Search term(s)**

- 1 TITLE-ABS-KEY ((( "family service\*" OR "family practice\*" OR "family practitioner\*" OR "family physician\*" OR "family doctor\*" OR "family nurse\*" OR "family team" OR "family teams" OR "family health" OR "family health care" OR "family healthcare" OR "family clinic\*" OR "family medicine" )) OR (( "general service\*" OR "general practice\*" OR "general practitioner\*" OR "general physician\*" OR "general doctor\*" OR "general nurse\*" OR "general team" OR "general teams" OR "general health" OR "general health care" OR "general healthcare" OR "general clinic\*" OR "general medicine" )) OR (( "primary care service\*" OR "primary care practice\*" OR "primary care practitioner\*" OR "primary care physician\*" OR "primary care doctor\*" OR "primary care nurse\*" OR "primary care team" OR "primary care teams" OR "primary care health" OR "primary care clinic\*" OR "primary care medicine" )) OR (( "primary service\*" OR "primary practice\*" OR "primary practitioner\*" OR "primary physician\*" OR "primary doctor\*" OR "primary nurse\*" OR "primary team" OR "primary teams" OR "primary health" OR "primary health care" OR "primary healthcare" OR "primary clinic\*" OR "primary medicine" )) OR (( "general practice service\*" OR "general practice physician\*" OR "general practice doctor\*" OR "general practice nurse\*" OR "general practice team" OR "general practice teams" OR "general practice health" OR "general practice health care" OR "general practice healthcare" OR "general practice clinic\*" OR "general practice medicine" )) OR (( "family practice service\*" OR "family practice physician\*" OR "family practice doctor\*" OR "family practice nurse\*" OR "family practice team" OR "family practice teams" OR "family practice health" OR "family practice health care" OR "family practice healthcare" OR "family practice clinic\*" OR "family practice medicine" )) OR (( "family health service\*" OR "family health physician\*" OR "family health doctor\*" OR "family health nurse\*" OR "family health team" OR "family health teams" OR "family health clinic\*" OR "family health medicine" ))))
- 2 TITLE-ABS-KEY ((( patient care OR patient-centered OR patient-centred OR patient centered OR patient centred OR coordinated OR clinical OR critical OR care OR integrat\* OR collaborat\* OR multidisciplinary OR comprehensive OR stepped OR psychosomatic OR shared OR behavioral health OR behavioural health OR interprofessional ) AND ( treat\* OR team\* OR care OR path\* OR managed OR management OR mental-health OR mental health OR psychosomatic OR behavioural health OR behavioral health OR healthcare OR health care OR health-care )))
- 3 TITLE-ABS-KEY (( psychiatr\* OR psycholog\* OR mental health OR mental disorder\* OR mental illness\* OR addiction OR alcoholi\* OR substance abuse\* OR substance-related disorder\* ))
- 4 TITLE-ABS-KEY ((( professional OR interprofessional OR continuing OR course\* OR staff OR program\* OR physician\* OR nurs\* OR simulation OR medical ) AND ( train\* OR education\* OR development )) OR ( training AND ( guide OR guides OR guideline\* OR material\* )) OR ( curricul\* OR instruction OR teach OR "continuing medical education" OR retrain\* OR inservice OR "on the job training" OR "on-the-job training" ))
- 5 #1 and #2 and #3 and #4

**TABLE 3. Search Strategy for Web of Science.** The following Indices were queried:

- Science Citation Index Expanded (SCI-EXPANDED) --1900-present
- Social Sciences Citation Index (SSCI) --1956-present
- Arts & Humanities Citation Index (A&HCI) --1975-present
- Conference Proceedings Citation Index- Science (CPCI-S) --1990-present
- Conference Proceedings Citation Index- Social Science & Humanities (CPCI-SSH) --1990-present
- Emerging Sources Citation Index (ESCI) --2015-present

**# Search term(s)**

- 1 TS=((family or general or "primary care" or primary or "general practice" or "family practice" or "family health") NEAR/2 (service\* or practice\* or practitioner\* or physician\* or doctor\* or nurs\* or team or teams or health or "health care" or healthcare or clinic\* or medicine))
- 2 TS=(psychiatr\* or psycholog\* or "mental health" or "mental disorder\*" or "mental illness\*" or addiction or alcoholi\* or "substance abuse\*" or "substance-related disorder\*")
- 3 TOPIC: (((("patient care" or "patient-centered" or "patient-centred" or "patient centered" or "patient centred" or coordinated or clinical or critical or care or integrat\$ or collaborat\* or multidisciplinary or comprehensive or stepped or psychosomatic or shared or "behavioral health" or "behavioural health" or interprofessional) NEAR/4 (treat\* or team\* or care or path\* or managed or management or mental-health or "mental health" or psychosomatic or "behavioural health" or "behavioral health" or healthcare or "health care" or "health-care"))))
- 4 TOPIC: ((curricul\* or instruction or teach or "continuing medical education" or retrain\* or inservice))
- 5 TOPIC: (((professional or interprofessional or continuing or course\* or staff or program\* or physician\* or nurs\* or simulation or medical) NEAR/2 (train\* or education\* or development)))
- 6 TOPIC: (training NEAR/3 (guide or guides or guideline\* or material\*))
- 7 TOPIC: (("on the job training" or "on-the-job training"))
- 8 #7 OR #6 OR #5 OR #4
- 9 (#8 AND #3 AND #2 AND #1) AND LANGUAGE: (English)
- 10 (WC=(psychology\* OR psychiatry OR primary health care OR emergency medicine)) OR (SU=(Life Sciences & Biomedicine OR Behavioral Sciences OR Critical Care Medicine OR Developmental Biology OR Emergency Medicine OR General & Internal Medicine OR Health Care Sciences & Services OR Social Work OR Integrative & Complementary Medicine OR Life Sciences Biomedicine Other Topics OR Neurosciences & Neurology OR Nursing OR Pharmacology & Pharmacy OR Psychiatry OR Research & Experimental Medicine OR Substance Abuse OR Psychology OR Social Work))
- 11 (WC=(Education & Educational Research or Education, Scientific Disciplines or Education, Special)) OR (SU=( Education & Educational Research))
- 12 #10 AND #9
- 13 #12 AND #11

# BMJ Open

## Scoping Review Protocol: Education Initiatives for Medical Psychiatry Collaborative Care

|                                 |                                                                                                                                                                                                                                                                                                                                                                                                                                                                                                                                                                                                                                                                                                                                                                                                                                                                                 |
|---------------------------------|---------------------------------------------------------------------------------------------------------------------------------------------------------------------------------------------------------------------------------------------------------------------------------------------------------------------------------------------------------------------------------------------------------------------------------------------------------------------------------------------------------------------------------------------------------------------------------------------------------------------------------------------------------------------------------------------------------------------------------------------------------------------------------------------------------------------------------------------------------------------------------|
| Journal:                        | <i>BMJ Open</i>                                                                                                                                                                                                                                                                                                                                                                                                                                                                                                                                                                                                                                                                                                                                                                                                                                                                 |
| Manuscript ID                   | bmjopen-2017-015886.R2                                                                                                                                                                                                                                                                                                                                                                                                                                                                                                                                                                                                                                                                                                                                                                                                                                                          |
| Article Type:                   | Protocol                                                                                                                                                                                                                                                                                                                                                                                                                                                                                                                                                                                                                                                                                                                                                                                                                                                                        |
| Date Submitted by the Author:   | 20-Jul-2017                                                                                                                                                                                                                                                                                                                                                                                                                                                                                                                                                                                                                                                                                                                                                                                                                                                                     |
| Complete List of Authors:       | Shen, Nelson; University of Toronto, Institute of Health Policy, Management and Evaluation; University Health Network<br>Sockalingam, Sanjeev; University of Toronto, Department of Psychiatry; University Health Network<br>Abi Jaoude, Alexxa; Centre for Addiction and Mental Health, Education<br>Bailey, Sharon; Centre for Addiction and Mental Health<br>Bernier, Thérèse; University of Toronto, Institute of Health Policy, Management and Evaluation<br>Freeland, Alison; Trillium Health Partners; University of Toronto, Department of Psychiatry<br>Hawa, Aceel; Centre for Addiction and Mental Health, Education<br>Hollenberg, Elisa; Centre for Addiction and Mental Health, Education<br>Woldemichael, Bethel; Centre for Addiction and Mental Health, Education<br>Wiljer, David; University Health Network; University of Toronto, Department of Psychiatry |
| <b>Primary Subject Heading</b>: | Medical education and training                                                                                                                                                                                                                                                                                                                                                                                                                                                                                                                                                                                                                                                                                                                                                                                                                                                  |
| Secondary Subject Heading:      | Mental health, Addiction, Medical education and training                                                                                                                                                                                                                                                                                                                                                                                                                                                                                                                                                                                                                                                                                                                                                                                                                        |
| Keywords:                       | collaborative care, PRIMARY CARE, MENTAL HEALTH, Integrated Care, MEDICAL EDUCATION & TRAINING, PSYCHIATRY                                                                                                                                                                                                                                                                                                                                                                                                                                                                                                                                                                                                                                                                                                                                                                      |
|                                 |                                                                                                                                                                                                                                                                                                                                                                                                                                                                                                                                                                                                                                                                                                                                                                                                                                                                                 |

SCHOLARONE™  
Manuscripts

## TITLE:

Scoping Review Protocol: Education Initiatives for Medical Psychiatry Collaborative Care

## AUTHORS:

Nelson Shen<sup>1</sup>, Sanjeev Sockalingam<sup>2,3</sup>, Alexxa Abi Jaoude<sup>4</sup>, Sharon Bailey<sup>4</sup>, Thérèse Bernier<sup>1</sup>,  
Alison Freeland<sup>2,5</sup>, Aceel Hawa<sup>4</sup>, Elisa Hollenberg<sup>4</sup>, Bethel Woldemichael<sup>4</sup>, David Wiljer<sup>1,2,3</sup>

## Institutions:

<sup>1</sup> Institute of Health Policy, Management and Evaluation, University of Toronto, Toronto, Canada

<sup>2</sup> Department of Psychiatry, University of Toronto, Toronto, Canada

<sup>3</sup> Centre for Mental Health, University Health Network, Toronto, Canada

<sup>4</sup> Education, Centre for Addiction and Mental Health, Toronto, Canada

<sup>5</sup> Trillium Health Partners, Mississauga, Canada

## Corresponding Author:

David Wiljer, PhD

University Health Network

190 Elizabeth Street, Room #441

Toronto, Ontario

Canada

Phone: 416 340 4800 ext. 6322

Email: david.wiljer@uhn.ca

## ABSTRACT

### Introduction:

The collaborative care model is an approach providing care to those with mental health and addictions disorders in the primary care setting. There is a robust evidence base demonstrating its clinical and cost effectiveness in comparison to usual care; however, the transitioning to this new paradigm of care has been difficult. While there are efforts to train and prepare healthcare professionals, not much is known about the current state of collaborative care training programs. The objective of this scoping review is to understand how widespread these collaborative education initiatives are, how they are implemented, and their impacts.

### Methods and analysis:

The scoping review methodology uses the established review methodology by Arksey and O'Malley. The search strategy was developed by a medical librarian and will be applied eight different databases spanning multiple disciplines. A two-stage screening process consisting of a title and abstract scan and a full-text review will be used to determine the eligibility of articles. To be included, articles must report on an existing collaborative care education initiative for healthcare providers. All articles will be independently assessed for eligibility by pairs of reviewers and all eligible articles will be abstracted and charted in duplicate using a standardized form. The extracted data will undergo a 'narrative review' or a descriptive analysis of the contextual or process-oriented data and simple quantitative analysis using descriptive statistics.

### Ethics and dissemination:

Research ethics approval is not required for this scoping review. The results of this scoping review will inform the development of a collaborative care training initiative emerging from the Medical Psychiatry Alliance, a four-institution philanthropic partnership in Ontario, Canada.

1  
2  
3 The results will also be presented at relevant national and international conferences and  
4  
5 published in a peer-reviewed journal.  
6  
7

8 **Keywords:** Collaborative care; Primary care; Mental Health; Addictions; Psychiatry; Integrated  
9  
10 care; Education; Training  
11

12 **Strengths and Limitations:**  
13

- 14  
15 • The results of this review will establish a baseline understanding of the delivery of  
16  
17 education initiatives for collaborative care – a timely and important topic required to  
18  
19 support the transition to a more integrated delivery of mental health and addiction care.  
20  
21
- 22 • This protocol outlines a rigorous study design which includes the use of an established  
23  
24 scoping review methodology, a multi-disciplinary search strategy developed iteratively in  
25  
26 consultation with an experienced medical librarian, and a study selection and data  
27  
28 extraction process that is carried out in tandem with validation from content experts.  
29  
30
- 31 • A limitation of the review is the potential to miss relevant articles given that education is  
32  
33 not always separated from the implementation of collaborative care; however, the  
34  
35 reference lists of included articles, relevant literature reviews, and key reports will be  
36  
37 hand-searched to identify articles missed by the search strategy.  
38  
39
- 40 • No formal quality assessment will be conducted as this review aims to provide a snapshot  
41  
42 of the landscape of collaborative care education initiatives by being inclusive of all types  
43  
44 of information available.  
45  
46
- 47 • While the review will be non-discriminant towards article types and methodologies, the  
48  
49 findings will be limited to articles written in English.  
50  
51  
52  
53  
54  
55  
56  
57  
58  
59  
60

**BACKGROUND:**

There is a growing disparity of unmet needs for mental health services[1,2] as the current supply of psychiatrists and current practice patterns create substantial barriers hindering access to psychiatric assessment and treatment[3–6]. In recent years, primary care has increasingly become the first contact point for those seeking mental health treatment[7,8]; however, individuals seeking care in these settings often receive sub-optimal care as providers are not properly equipped or trained to manage complex physical and mental health conditions[9]. The disconnect with mental health services contributes to the treatment gap, making it difficult for individuals to receive the proper care, especially for those with co-morbidity or multi-morbidity. This inattention may further exacerbate their condition or lead to premature death due to their physical health conditions[10–12]. Backed by a growing and robust evidence base, there is a case for integrating mental healthcare into the primary care setting through a collaborative care model. Several meta-analyses[13–17] have demonstrated that collaborative care models can be more effective in treating mental health disorders than usual care. The collaborative care model has also demonstrated its value by improving quality of life for co-morbid patients for no or modest additional cost[18].

Collaborative care is often used interchangeably with other terms (e.g., mental health integration, integrated care, integrated mental health) to describe a range of models of care that consist of healthcare professionals working in partnership in a primary care setting to deliver mental healthcare; however, the degree of integration of the two disciplines vary depending on model[19]. Recently, an American Psychiatric Association/American Psychosomatic Medicine (APA/APM) working group to provide clarity and a standardized evidence-based integrated care

1  
2  
3 model. Derived from the seminal research by Katon et al.[20] and Wagner’s Chronic Care  
4  
5 Model[21], the APA/APM Collaborative Care model[22] defines collaborative care as the  
6  
7  
8 provision of care that is: 1) team-driven, 2) population-focused, 3) measurement-guided, and 4)  
9  
10 evidence-based. The focal point is the collaborative care team who consist of a multidisciplinary  
11  
12 group of professionals (e.g., psychiatric nurse practitioner, social worker, licensed counsellor or  
13  
14 therapist, psychologist, or psychiatrist, care managers, and office support staff) thereby  
15  
16 extending beyond the “physician as treatment team” in providing and supporting care and  
17  
18 implementing and revising the treatment plan. The new definition was developed to support  
19  
20 informed decision-making by policy-makers, healthcare providers, service delivery  
21  
22 organizations, the public, and to help standardize future training in this area.  
23  
24  
25  
26  
27  
28

29  
30 Despite the increasing recognition and implementation of the collaborative care model, there  
31  
32 remain difficulties in implementation as there is a lack of adequately prepared workforce [23].  
33  
34 The transition from a traditional care delivery model is a challenge as there are many new  
35  
36 processes and systems-level differences between integrated behavioural health and traditional  
37  
38 primary care settings that new team members must navigate [24,25]. Many programs have been  
39  
40 developed and implemented to provide training to provide individuals with the necessary skills,  
41  
42 knowledge, competencies, and attitudes to support the collaborative model of care [23–25]. A  
43  
44 variety of training approaches have been implemented, including training by internal or external  
45  
46 experts, onsite or offsite sessions, onboarding processes for new employees, training manuals,  
47  
48 shadowing processes and peer mentoring[23,25]. However, there have been calls for increased  
49  
50 pre-licensure training to take the burden off of such workplace training programs that can be  
51  
52 expensive and resource-intensive[23]. Furthermore, a recent editorial[26] has identified the need  
53  
54  
55  
56  
57  
58  
59  
60

1  
2  
3 to move beyond competency-based training in integrated care and called for integration of  
4  
5 theoretical frameworks, namely adaptive expertise, to better prepare future health care  
6  
7 professionals for managing complexity within integrated care settings.  
8  
9

10  
11  
12 While there have been tremendous efforts in the development of the collaborative care model  
13  
14 and the training supports, not much is known about the current scope of integrated care  
15  
16 education, how it is delivered, to whom, in what contexts, the content of the training, and  
17  
18 whether it is effective. There is a need to collect all the knowledge and experiences from existing  
19  
20 training programs, to continually improve current process of these programs, and to support the  
21  
22 development of new programs. The objective of this scoping review is to gain an understanding  
23  
24 of the current landscape of integrated care education.  
25  
26  
27  
28  
29  
30  
31

## 32 **METHODS**

33  
34 This review is being conducted to inform the development of a collaborative care training  
35  
36 initiative emerging from the Medical Psychiatry Alliance, a four-institution, Ministry of Health  
37  
38 and Long-Term Care, and philanthropic partnership in Ontario, Canada. Various knowledge  
39  
40 synthesis approaches were considered for this review; however, the scoping review  
41  
42 methodology is most appropriate especially since the complex area of collaborative care  
43  
44 education has not been reviewed comprehensively before [27,28]. To the authors' knowledge,  
45  
46 there has been no prior attempt to establish a baseline of knowledge regarding collaborative care  
47  
48 education initiatives. Given this knowledge gap and that literature may be diffuse due to the  
49  
50 multidisciplinary nature of collaborative care, scoping reviews are ideal in taking stock of the  
51  
52 volume and nature of the literature [28]. Utilizing this form of knowledge synthesis allows for  
53  
54  
55  
56  
57  
58  
59  
60

1  
2  
3 the broad exploration of collaborative care education to map key concepts, evidence types, and  
4  
5 gaps in research in a defined field; furthermore, scoping review make use of a wide array of  
6  
7 knowledge exhibited through empirical research and anecdotal accounts [29–31].  
8  
9

10  
11  
12 The methodology for this review draws upon Arksey and O'Malley's seminal framework [29]  
13  
14 for scoping reviews as the foundation and more recent advancements to the methodology  
15  
16 [30,32]. As recommended by Colquhoun et al.[33] , this protocol follows the relevant aspects of  
17  
18 the Preferred Reporting Items for Systematic Review and Meta-Analysis Protocols (PRISMA-P)  
19  
20 guidelines[34] to ensure rigour in reporting the methodology in the interim while PRISMA  
21  
22 guidelines are developed for scoping reviews[35] . Scoping reviews share a similar process as  
23  
24 systematic reviews since they both are rigorous and transparent in identifying eligible literature  
25  
26 but are divergent in purpose as scoping reviews aim to map the body of literature rather than sum  
27  
28 up the best available research on a specific question [36]. Scoping reviews are often seen as a  
29  
30 precursor to systematic reviews as it allows researchers to determine the value and probable  
31  
32 scope of a full systematic review and meta-analysis [29,37,38].  
33  
34  
35  
36  
37  
38  
39  
40

### 41 **Stage 1: identifying the research question**

42  
43 The objective of this review is to understand the current state of collaborative care education  
44  
45 initiatives by identifying existing initiatives (e.g., training programs, interventions) reported in  
46  
47 both academic and grey literature. By identifying the past and current education initiatives, this  
48  
49 review seeks to establish a foundational understanding of how these programs were implemented  
50  
51 and glean the critical success factors and recommendations of these experiences. To meet these  
52  
53 objective, this review asks the following questions:  
54  
55  
56  
57  
58  
59  
60

- What educational interventions exist within integrated collaborative care programs in hospital, community, and primary care settings?
- What aspects of collaborative care are taught in the educational interventions?
- How well do the interventions incorporate the core collaborative care principles as outlined in the APA/APM document?
- How were the interventions delivered? What were the critical success factors and lessons learned?

While the primary focus of this review is to take an inventory of existing programs and their processes, this review will also provide a narrative view on the extent to which these initiatives have been evaluated and provide a descriptive review of the effectiveness of current efforts in educating the health professions about collaborative care. The review will ask “What aspects of collaborative care programs have been evaluated” and “What were the outcomes of the evaluations (e.g., user perceptions, attitudinal changes, changes in knowledge and competency, behaviour change, organizational and clinical impact)?”

### **Stage 2: identifying relevant studies**

The search strategy was iteratively developed by the research team in collaboration with an experienced medical librarian (SB) and implemented on July 2016 in eight electronic databases: Medline, Medline In-Process, PsycINFO, EMBASE, CINAHL, ERIC, Scopus, and ISI Web of Science. These databases were selected to capture a comprehensive sample of literature from health sciences, psychiatry, education, and other disciplines. The search query was first developed for Medline. Medline (Ovid) was selected as the first database to query because the

1  
2  
3 Ovid interface facilitates fine-tuning at a level that PubMed does not; moreover, an added  
4  
5 advantage to using Medline is its use of the National Library of Medicine's controlled  
6  
7 vocabulary, MeSH®, to index citations[39]. Any chance in missing articles from PubMed were  
8  
9 reduced by searching Ovid Medline "In-Process & Other Non-Indexed Citation" database to  
10  
11 capture the most recent literature possible. The Ovid interface is also a shared platform which  
12  
13 allows for quicker translation and querying of other Ovid-based databases (Medline In-Process,  
14  
15 PsycINFO, and EMBASE).  
16  
17  
18  
19

20  
21  
22 The search strategy consisted of subject headings, keywords and related terms for primary care,  
23  
24 integrated care, education, and mental health services, personnel, and conditions. Depending on  
25  
26 the database, some subject terms were "exploded" which allowed us to capture all relevant  
27  
28 search topics under a given term (e.g., using "exp mental disorders/" in Medline will catch all  
29  
30 possible mental health diagnoses and conditions). Terms and concepts were combined using  
31  
32 Boolean logic and operators including adjacencies. The searches were limited to articles in  
33  
34 English and published after 1995 – when the collaborative care model was first introduced  
35  
36 [20,22]. The search terms were then translated for use in the other databases. Applying the same  
37  
38 search string to ISI Web of Science (interdisciplinary) required some modifications and a  
39  
40 different approach to reduce the noise in the results. Specifically, the research categories and  
41  
42 subject area limiters were used to reduce the yield to a manageable volume while maintaining the  
43  
44 specificity required for this review. The first 100 search results from each database were  
45  
46 reviewed by the research team to ensure validity of the search strategy - see Additional File 1 for  
47  
48 full strategy.  
49  
50  
51  
52  
53  
54  
55  
56  
57  
58  
59  
60

1  
2  
3  
4  
5  
6 The results from the search were imported into Mendeley desktop reference manager where the  
7  
8 citations were collated and de-duplicated. The research team was granted access to the citations  
9  
10 and articles using the Mendeley web-based collaboration function. The citations were then  
11  
12 copied and pasted into a spreadsheet for use in the subsequent eligibility screening and charting  
13  
14 processes.  
15  
16

### 17 18 19 20 **Stage 3: study selection**

21  
22 A two-stage screening process consisting of a title and abstract scan and a full-text review will be  
23  
24 used to determine the eligibility of articles. Both stages will follow the same process, where  
25  
26 every article will be independently reviewed in pairs and the results will be documented on the  
27  
28 spreadsheet. At the end of each round, the ratings will be compared and resolved by the two  
29  
30 reviewers or a third reviewer when consensus is not achieved. Any ambiguities regarding the  
31  
32 eligibility of a citation (or article) will be flagged and discussed.  
33  
34  
35  
36  
37  
38

39 The citations will be assessed for relevance based on a title and abstract scan. To be relevant for  
40  
41 full-text review, the title and abstract must: focus on providers from different specialities,  
42  
43 disciplines, or sectors working together to offer complementary services or support in delivering  
44  
45 care; be about delivering mental health and addictions care; and describe an existing education  
46  
47 intervention. This review is inclusive of all types of literature, thus including commentary  
48  
49 articles, case studies, and empirical studies employing all types of methodologies (i.e.,  
50  
51 qualitative, quantitative, and mixed methods) and study designs. Viewpoint articles on how  
52  
53  
54  
55  
56  
57  
58  
59  
60

1  
2  
3 education programs should be implemented outside of the context of an existing program are  
4  
5 excluded.  
6  
7  
8  
9

10 The criteria will be piloted by the reviewers to refine and establish a common understanding of  
11 the inclusion criteria. After a training session, 20% of the Medline citations will be  
12 independently reviewed by four reviewers to establish inter-rater reliability (IRR). The results of  
13 the review will be compared and the interrater reliability will be calculated. The threshold for  
14 IRR is set at an average Cohen's K of 0.70 indicating substantial agreement[40]. The pilot will  
15 be run again if the threshold was not met. If met, the remaining articles will then be divided and  
16 assigned to two sets of pairs for independent review. These adjustments to the inclusion  
17 exclusion process are appropriate as they provide the team with opportunities to become familiar  
18 with the data and to reduce workload [30,32]. This protocol made an additional adjustment by  
19 adding the IRR to establish agreement between reviewers and provide more context to the study  
20 selection process. Regardless of the IRR outcome, a meeting about the process will be held to  
21 compare the results, resolve the disagreements, and troubleshoot the challenges that arose during  
22 the title-abstract review process.  
23  
24  
25  
26  
27  
28  
29  
30  
31  
32  
33  
34  
35  
36  
37  
38  
39  
40  
41  
42

43 Relevant articles identified in the title and abstract scan will undergo a full-text review to  
44 confirm the articles eligibility for the review. The full-text review follows the same process as  
45 the title and abstract scan. To be included, the article must be about a collaborative care  
46 education initiative for healthcare providers. The full-text review form asked reviewers to assess  
47 each article using the following questions:  
48  
49  
50  
51  
52  
53  
54  
55  
56  
57  
58  
59  
60

1. Does the article describe/discuss the provision of care related to mental health in a primary care setting?
2. Does the article describe an education intervention/program?
3. Does the education intervention focus on delivering team-based care?

#### Step 4: charting the data

A standardized charting form will be developed by the research team to allow the investigators to categorize or ‘chart’ the data. The high-level domains for the charting form consist of article details, study details (if applicable), initiative details, and implementation factors. The specifics of each domain are outlined in Table 1. There will be a training session to trial the charting form and ensure there is a common understanding of the categories and how to use the form. The full-text reviewers will be asked if there are any additional variables emerging from the full-text review to consider for charting. The form will be piloted on five to ten articles by the team. This will consist of independent charting by the reviewers and validation by the senior investigators. A final round of feedback on the form will be solicited prior to the charting process. The charting will also consist of independent charting by the reviewers and validation by the senior investigators. The charters will be encouraged to provide constant feedback on emerging themes not captured in the charting form. The form will be revised as required.

Table 1. Data charting domains and elaboration of sub-domains.

| Domain/<br>Sub-Domains               | Description                                                         |
|--------------------------------------|---------------------------------------------------------------------|
| <b>Article details</b>               |                                                                     |
| Article type                         | Is the article an empirical study, case study, or commentary?       |
| Year                                 | Article Year                                                        |
| Country                              | Which country is this article from?                                 |
| <b>Study details (if applicable)</b> |                                                                     |
| Study design                         | If it is an empirical article, what was the study design? Report as |

1  
2  
3  
4  
5  
6  
7  
8  
9  
10  
11  
12  
13  
14  
15  
16  
17  
18  
19  
20  
21  
22  
23  
24  
25  
26  
27  
28  
29  
30  
31  
32  
33  
34  
35  
36  
37  
38  
39  
40  
41  
42  
43  
44  
45  
46  
47  
48  
49  
50  
51  
52  
53  
54  
55  
56  
57  
58  
59  
60

described by authors.

|                |                                                               |
|----------------|---------------------------------------------------------------|
| Participants   | Who were the study participants?                              |
| Intervention   | What was the intervention? Report as described by the author. |
| Comparator     | What was the comparator (if applicable)?                      |
| Study outcomes | What did the authors identify as the study outcomes?          |
| Outcomes       | What were the main results of the study?                      |

**Initiative details**

|                  |                                                                                      |
|------------------|--------------------------------------------------------------------------------------|
| Name             | What is the name of the program (if applicable)?                                     |
| Setting          | Where does the education program take place? (e.g., community, hospital, university) |
| Participants     | Who were the participants of the program?                                            |
| Program delivery | How is the program delivered? (e.g., seminar, lecture, course, in-service training). |
| Instructors      | Who are the facilitators/instructors?                                                |
| Program length   | How long was the program/intervention?                                               |

*APA/APM Principles*[22]

1. *Team Driven* Does the program teach a team-based approach of multi-professionals to provide and support care and monitor treatment plans?
2. *Specific population* Does the program focus on the provision of care and health outcomes of a defined population of patients?
3. *Measurement* Does the program focus on systematic, disease-specific, patient-reported outcome measures (e.g., symptom rating scales) to drive clinical decision-making?
4. *Evidence based* Does the program focus on the application of proven treatments within an individual clinical context to achieve MBC outcomes?

**Implementation factors**

|                 |                                                                    |
|-----------------|--------------------------------------------------------------------|
| Success         | How did the authors define program success?                        |
| Enablers        | What factors that contributed to the success of the program?       |
| Barriers        | What factors may have detracted from the success of the program?   |
| Recommendations | What were the author's recommendations based on their experiences? |

**Stage 5: collating, summarizing, and reporting the results**

The extracted data will first undergo a simple quantitative analysis using descriptive statistics (e.g., frequencies, central tendency measures) to provide numerical summaries of the education initiatives and article or study characteristics[29]. Multiple articles stemming from a single initiative will be grouped and treated as a unit of analysis. The data will also undergo a 'narrative review' or a descriptive analysis of the contextual or process-oriented data, where all

1  
2  
3 data will be thematically analysed independently by two reviewers to identify emerging themes  
4  
5 found within each of the sub-domains outlined in Table 1. The results will be compared and  
6  
7 consolidated by consensus between the two reviewers. The resulting themes will be reviewed by  
8  
9 content experts to ensure validity and credibility. The themes will be reported to highlight the  
10  
11 similarities, patterns, differences, and outliers found in the literature.  
12  
13

14  
15  
16  
17 The results from empirical studies (i.e., qualitative, quantitative, and mixed methods) will be  
18  
19 classified into learner and clinical outcomes based on the Kirkpatrick-Barr framework[41] for  
20  
21 interprofessional learner outcomes. This framework was selected because of its focus on  
22  
23 interprofessional collaboration which can be applicable to the multi-disciplinary setting.  
24  
25

26  
27 Thematic analysis will also be used to identify commonalities within each of the levels of the  
28  
29 following outcome typology:  
30

- 31  
32 • Level 1: learners' reaction—participant views of the learning experience and satisfaction  
33  
34 with the program;  
35
- 36  
37 • Level 2a: modification of attitudes/perceptions—changes in reciprocal attitudes or  
38  
39 perceptions between participant groups, toward patients/clients and their condition,  
40  
41 circumstances, care, and treatment;  
42
- 43  
44 • Level 2b: acquisition of knowledge/skills—changes in knowledge and skills;  
45
- 46  
47 • Level 3: change in behavior—changes in behavior transferred from the learning  
48  
49 environment to the workplace;  
50
- 51  
52 • Level 4a: change in organizational practice—changes in the organization or delivery of  
53  
54 care attributable to an education program;  
55  
56  
57  
58  
59  
60

- Level 4b: benefits to patients/clients—improvements in the health and well-being of patients/clients as a direct result of an education program.

Details of the education initiatives and study outcomes will be summarized in a table. The articles will not be assessed for quality as it is outside the scope of this review; however, details of the included articles (i.e., article type and methodology) will be reported in a summary table to provide context of the maturity of the evidence.

## **ETHICS/DISSEMINATION**

This protocol reports a comprehensive, rigorous, and transparent methodology. This review contributes to the advancement of research on this subject and comment on the maturity of the body of literature by identifying gaps in knowledge and research. Through the publication of the results and dissemination at relevant conferences, the results of this review could guide the direction of future research. The results from this review may inform the design of new initiatives and the policies which support them; moreover, future implementations can learn from the experience of others to avoid potential barriers and focus on enablers to increase the chances of success of their programs – existing or new.

**Acknowledgements:** The authors' work is supported in part by the Medical Psychiatry Alliance, a collaborative health partnership of the University of Toronto, the Centre for Addiction and Mental Health, the Hospital for Sick Children, Trillium Health Partners, the Ontario Ministry of Health and Long-Term Care, and an anonymous donor. The authors would also like to thank Rebecca Charow for her fresh eyes in proofreading and editing the manuscript.

1  
2  
3 **Authors' contributions:** NS led the design and conceptualization of this work and drafted the  
4  
5 protocol. AA, TB, AH, EH, BW were involved in the conceptualization of the review design,  
6  
7 specifically in establishing the inclusion and exclusion criteria. EH and BW drafted the  
8  
9 background section of the protocol and provided feedback on the methodology and the  
10  
11 manuscript. SB developed the search strategy, conducted the search, provided feedback on the  
12  
13 manuscript, and copy-edited the manuscript. AF, SS, and DW provided guidance to the  
14  
15 conceptualization and design of the study, data analyses, and have revised all drafts of this  
16  
17 manuscript for important intellectual content and clarity. All authors give approval to the  
18  
19 publishing of this protocol manuscript.  
20  
21  
22  
23

24 **Competing interests:** The authors declare that they have no competing interests.  
25  
26

27 **Funding:** Not applicable  
28  
29  
30  
31  
32  
33

## 34 REFERENCES

- 35  
36  
37 1 Roll JM, Kennedy J, Tran M, *et al.* Disparities in unmet need for mental health services in  
38  
39 the United States, 1997-2010. *Psychiatr Serv* 2013;**64**:80–2.  
40  
41 doi:10.1176/appi.ps.201200071  
42  
43  
44 2 Sunderland A, Findlay LC. Perceived need for mental health care in Canada: Results from  
45  
46 the 2012 Canadian community health survey – mental health. *Heal Reports* 2013;**24**:3–9.  
47  
48 doi:82-003-X  
49  
50  
51 3 Goldner EM, Jones W, Fang ML. Access to and waiting time for psychiatrist services in a  
52  
53 Canadian urban area: A study in real time. *Can J Psychiatry* 2011;**56**:474–80.  
54  
55 doi:10.1177/070674371105600805  
56  
57  
58  
59  
60

- 1  
2  
3  
4 4 Bishop TF, Press MJ, Keyhani S, *et al.* Acceptance of insurance by psychiatrists and the  
5 implications for access to mental health care. *JAMA psychiatry* 2014;**71**:176–81.  
6  
7  
8 doi:10.1001/jamapsychiatry.2013.2862  
9
- 10 5 Kurdyak P, Zaheer J, Cheng J, *et al.* Changes in Characteristics and Practice Patterns of  
11 Ontario Psychiatrists. *Can J Psychiatry* 2016;:706743716661325.  
12  
13  
14 doi:10.1177/0706743716661325  
15
- 16 6 Cunningham PJ. Beyond parity: primary care physicians' perspectives on access to mental  
17 health care. *Health Aff (Millwood)* 2009;**28**:w490-501. doi:10.1377/hlthaff.28.3.w490  
18  
19
- 20 7 Wang PS, Lane M, Olfson M, *et al.* Twelve-Month Use of Mental Health Services in the  
21 United States. *Arch Gen Psychiatry* 2005;**62**:629. doi:10.1001/archpsyc.62.6.629  
22  
23  
24
- 25 8 Wang PS, Demler O, Olfson M, *et al.* Changing profiles of service sectors used for mental  
26 health care in the United States. *Am J Psychiatry* 2006;**163**:1187–98.  
27  
28  
29  
30  
31  
32  
33 doi:10.1176/appi.ajp.163.7.1187
- 34 9 Knickman J, Krishnan R, Pincus H. Improving Access to Effective Care for People With  
35 Mental Health and Substance Use Disorders. *Jama* Published Online First: 2016.  
36  
37  
38  
39  
40  
41  
42  
43  
44  
45  
46  
47  
48  
49  
50  
51  
52  
53  
54  
55  
56  
57  
58  
59  
60
- 10 10 Ivbijaro GO, Enum Y, Khan AA, *et al.* Collaborative care: models for treatment of  
patients with complex medical-psychiatric conditions. *Curr Psychiatry Rep* 2014;**16**:506.  
doi:10.1007/s11920-014-0506-4
- 11 11 Patel V, Belkin GS, Chockalingam A, *et al.* Grand Challenges: Integrating Mental Health  
Services into Priority Health Care Platforms. *PLoS Med* 2013;**10**.  
doi:10.1371/journal.pmed.1001448
- 12 12 Walker ER, McGee RE, Druss BG. Mortality in Mental Disorders and Global Disease

- 1  
2  
3 Burden Implications. *JAMA Psychiatry* 2015;**72**:334–41.  
4  
5  
6 doi:10.1001/jamapsychiatry.2014.2502  
7
- 8 13 Gilbody S. Collaborative Care for Depression. *Arch Intern Med* 2006;**166**:2314.  
9  
10 doi:10.1001/archinte.166.21.2314  
11
- 12 14 Thota AB, Sipe TA, Byard GJ, *et al.* Collaborative care to improve the management of  
13 depressive disorders: A community guide systematic review and meta-analysis. *Am J Prev*  
14  
15  
16  
17  
18  
19  
20  
21  
22  
23  
24  
25  
26  
27  
28  
29  
30  
31  
32  
33  
34  
35  
36  
37  
38  
39  
40  
41  
42  
43  
44  
45  
46  
47  
48  
49  
50  
51  
52  
53  
54  
55  
56  
57  
58  
59  
60
- 14 14 Thota AB, Sipe TA, Byard GJ, *et al.* Collaborative care to improve the management of  
depressive disorders: A community guide systematic review and meta-analysis. *Am J Prev*  
*Med* 2012;**42**:525–38. doi:10.1016/j.amepre.2012.01.019
- 15 15 Archer J, Bower P, Gilbody S, *et al.* Collaborative care for depression and anxiety  
problems. *Cochrane Database Syst Rev* 2012;**10**:CD006525.  
doi:10.1002/14651858.CD006525.pub2
- 16 16 Coventry PA, Hudson JL, Kontopantelis E, *et al.* Characteristics of effective collaborative  
care for treatment of depression: A systematic review and meta-regression of 74  
randomised controlled trials. *PLoS One* 2014;**9**. doi:10.1371/journal.pone.0108114
- 17 17 Panagioti M, Bower P, Kontopantelis E, *et al.* Association Between Chronic Physical  
Conditions and the Effectiveness of Collaborative Care for Depression. *JAMA Psychiatry*  
2016;**73**:978. doi:10.1001/jamapsychiatry.2016.1794
- 18 18 Katon W, Russo J, Lin EHB, *et al.* Cost-effectiveness of a multicondition collaborative  
care intervention: a randomized controlled trial. *Arch Gen Psychiatry* 2012;**69**:506–14.  
doi:10.1001/archgenpsychiatry.2011.1548
- 19 19 Kwan BM, Nease DE. The State of the Evidence for Integrated Behavioral Health in  
Primary Care. In: *Integrated Behavioral Health in Primary Care*. New York, NY: :  
Springer New York 2013. 65–98. doi:10.1007/978-1-4614-6889-9\_5
- 20 20 Katon W. Collaborative care: Patient satisfaction, outcomes, and medical cost-offset. *Fam*

- 1  
2  
3 *Syst Med* 1995;**13**:351–65. doi:10.1037/h0089387
- 4  
5  
6 21 Wagner EH. Meeting the needs of chronically ill people. *BMJ* 2001;**323**:945–6.  
7  
8 doi:10.1136/bmj.323.7319.945  
9
- 10  
11 22 American Psychiatric Association, Academy of Psychosomatic Medicine. Dissemination  
12  
13 of Integrated Care Within Adult Primary Care Settings: The Collaborative Care Model.  
14  
15 2016.  
16
- 17  
18 23 Hall J, Cohen DJ, Davis M, *et al*. Preparing the Workforce for Behavioral Health and  
19  
20 Primary Care Integration. *J Am Board Fam Med* 2015;**28 Suppl 1**:S41-51.  
21
- 22  
23 24 Ratzliff A, Norfleet K, Chan Y-F, *et al*. Perceived Educational Needs of the Integrated  
24  
25 Care Psychiatric Consultant. *Acad Psychiatry* 2015;**39**:448–56.  
26
- 27  
28 25 Dickinson WP. Strategies to Support the Integration of Behavioral Health and Primary  
29  
30 Care: What Have We Learned Thus Far?. *J Am Board Fam Med* 2015;**28 Suppl 1**:S102-6.  
31
- 32  
33 26 Sockalingam S, Mulsant BH, Mylopoulos M. Beyond integrated care competencies: The  
34  
35 imperative for adaptive expertise. *Gen Hosp Psychiatry* 2016;**43**:30–1.  
36  
37 doi:10.1016/j.genhosppsy.2016.09.002  
38
- 39  
40 27 Mays N, Roberts E, Popay J. Synthesising research evidence. In: *Studying the*  
41  
42 *organisation and delivery of health services: Research methods*. 2001. 188–220.  
43
- 44  
45 28 Wilson M, Lavis J, Guta A. Community-based organizations in the health sector: A  
46  
47 scoping review. *Heal Res Policy Syst* 2012;**10**:36. doi:10.1186/1478-4505-10-36  
48
- 49  
50 29 Arksey H, O'Malley L. Scoping studies: towards a methodological framework. *Int J Soc*  
51  
52 *Res Methodol* 2005;**8**:19–32. doi:10.1080/1364557032000119616  
53
- 54  
55 30 Levac D, Colquhoun H, O'Brien KK. Scoping studies: advancing the methodology.  
56  
57 *Implement Sci* 2010;**5**:69. doi:10.1186/1748-5908-5-69  
58  
59  
60

- 1  
2  
3  
4  
5  
6  
7  
8  
9  
10  
11  
12  
13  
14  
15  
16  
17  
18  
19  
20  
21  
22  
23  
24  
25  
26  
27  
28  
29  
30  
31  
32  
33  
34  
35  
36  
37  
38  
39  
40  
41  
42  
43  
44  
45  
46  
47  
48  
49  
50  
51  
52  
53  
54  
55  
56  
57  
58  
59  
60
- 31 Colquhoun HL, Levac D, O'Brien KK, *et al.* Scoping reviews: Time for clarity in definition, methods, and reporting. *J Clin Epidemiol* 2014;**67**:1291–4.  
doi:10.1016/j.jclinepi.2014.03.013
- 32 Daudt HML, van Mossel C, Scott SJ. Enhancing the scoping study methodology: a large, inter-professional team's experience with Arksey and O'Malley's framework. *BMC Med Res Methodol* 2013;**13**:48. doi:10.1186/1471-2288-13-48
- 33 Colquhoun H. Current Best Practices for the Conduct of Scoping Reviews. EQUATOR Netw. 2016.[http://www.equator-network.org/wp-content/uploads/2016/06/Gerstein-Library-scoping-reviews\\_May-12.pdf](http://www.equator-network.org/wp-content/uploads/2016/06/Gerstein-Library-scoping-reviews_May-12.pdf) (accessed 20 May2017).
- 34 Shamseer L, Moher D, Clarke M, *et al.* Preferred reporting items for systematic review and meta-analysis protocols (PRISMA-P) 2015: elaboration and explanation. *BMJ* 2015;**349**:g7647–g7647. doi:10.1136/bmj.g7647
- 35 Tricco A, Straus S, Moher D. Preferred Reporting Items for Systematic Reviews and Meta-Analysis: extension for Scoping Reviews (PRISMA-ScR). EQUATOR Netw. [http://www.equator-network.org/wp-content/uploads/2009/02/Executive-summary\\_ScR\\_Dec-9.pdf](http://www.equator-network.org/wp-content/uploads/2009/02/Executive-summary_ScR_Dec-9.pdf) (accessed 20 May2017).
- 36 Pham MT, Rajić A, Greig JD, *et al.* A scoping review of scoping reviews: Advancing the approach and enhancing the consistency. *Res Synth Methods* 2014;**5**:371–85.  
doi:10.1002/jrsm.1123
- 37 The Joanna Briggs Institute. *Methodology for JBI Scoping reviews*. Joanna Briggs Insitute 2015.
- 38 Peters MDJ, Godfrey CM, Khalil H, *et al.* Guidance for conducting systematic scoping reviews. *Int J Evid Based Healthc* 2015;**13**:141–6. doi:10.1097/XEB.0000000000000050

- 1  
2  
3 39 U.S. National Library of Medicine. Fact Sheet - MEDLINE, PubMed, and PMC (PubMed  
4  
5 Central): How are they different?  
6  
7  
8 2017.[https://www.nlm.nih.gov/pubs/factsheets/dif\\_med\\_pub.html](https://www.nlm.nih.gov/pubs/factsheets/dif_med_pub.html) (accessed 20  
9  
10 May2017).  
11  
12 40 Landis JR, Koch GG. The measurement of observer agreement for categorical data.  
13  
14 *Biometrics* 1977;**33**:159–74.  
15  
16  
17 41 Barr H, Freeth D, Hammick M, *et al.* Evaluations of interprofessional education. London:  
18  
19 2000.  
20  
21  
22  
23  
24  
25  
26  
27  
28  
29  
30  
31  
32  
33  
34  
35  
36  
37  
38  
39  
40  
41  
42  
43  
44  
45  
46  
47  
48  
49  
50  
51  
52  
53  
54  
55  
56  
57  
58  
59  
60

## Appendix A – Scoping Review Search Strategy

**Table 1. Search strategy for MEDLINE, MEDLINE In-Progress, PsycINFO, EMBASE, and CINAHL.**

NB: Only MEDLINE search strategy included. The search strategies for the other databases were similar in structure with similar search terms and synonyms. Contact the corresponding author for the full search strategy for each database.

| #  | Search Term(s)                                                                                                                                                                                                                                                                                                                                           |
|----|----------------------------------------------------------------------------------------------------------------------------------------------------------------------------------------------------------------------------------------------------------------------------------------------------------------------------------------------------------|
| 1  | Family Practice/ or General Practice/ or Physicians, Family/ or Physicians, Primary Care/ or General Practitioners/ or Primary Health Care/                                                                                                                                                                                                              |
| 2  | ((primary or "primary care" or family or general) adj2 (doctor* or physician* or practice* or practitioner* or medicine)) or "family health team*").mp.                                                                                                                                                                                                  |
| 3  | ((primary care or family practice or family health or family or general practice) adj2 nurs*).mp.                                                                                                                                                                                                                                                        |
| 4  | ("general practice clinic*" or "family practice clinic*" or "primary care clinic*" or "family clinic*" or "medical home").mp.                                                                                                                                                                                                                            |
| 5  | Family Nurse Practitioners/ or "family nurse practitioner*").mp.                                                                                                                                                                                                                                                                                         |
| 6  | exp psychiatry/ or psychology/                                                                                                                                                                                                                                                                                                                           |
| 7  | medical psychiatry.mp.                                                                                                                                                                                                                                                                                                                                   |
| 8  | mental health services/                                                                                                                                                                                                                                                                                                                                  |
| 9  | exp mental disorders/ or exp substance-related disorders/                                                                                                                                                                                                                                                                                                |
| 10 | child guidance/                                                                                                                                                                                                                                                                                                                                          |
| 11 | psychiatric nursing/                                                                                                                                                                                                                                                                                                                                     |
| 12 | community mental health services/                                                                                                                                                                                                                                                                                                                        |
| 13 | social work, psychiatric/                                                                                                                                                                                                                                                                                                                                |
| 14 | emergency services, psychiatric/                                                                                                                                                                                                                                                                                                                         |
| 15 | "Delivery of Health Care, Integrated"/ or Comprehensive Health Care/ or "Continuity of Patient Care"/ or Interprofessional Relations/ or Interdisciplinary Communication/ or exp Patient Care Planning/ or exp Patient Care Team/ or Cooperative Behavior/ or Case Management/ or Patient-centered Care/ or Patient Navigation/                          |
| 16 | (co-located or patient-centered or patient centred or patient centered).mp.                                                                                                                                                                                                                                                                              |
| 17 | ((clinical or critical or care or integrat\$ or collaborat* or comprehensive or stepped or psychosomatic or shared or "behavioral health" or interprofessional) adj4 (treat\$ or team* or care* or path*)).mp.                                                                                                                                           |
| 18 | ((coordinated or clinical or critical or care or integrat\$ or collaborat* or comprehensive or stepped or psychosomatic or shared or interprofessional) adj4 (treat* or team* or care or path* or managed or management or mental-health or mental health or psychosomatic or behavioural health or behavioral health or healthcare or health care)).mp. |

## # Search Term(s)

- 1  
2  
3  
4  
5 19 education/ or curriculum/ or competency-based education/ or interdisciplinary studies/ or  
6 "mainstreaming (education)"/ or problem-based learning/ or education, distance/ or education,  
7 premedical/ or education, professional/ or education, continuing/ or education, medical,  
8 continuing/ or education, nursing, continuing/ or education, pharmacy, continuing/ or  
9 education, professional, retraining/ or education, graduate/ or education, medical, graduate/ or  
10 education, nursing, graduate/ or education, pharmacy, graduate/ or education, medical/ or  
11 education, medical, undergraduate/ or "internship and residency"/ or teaching rounds/ or  
12 education, nursing/ or education, nursing, associate/ or education, nursing, baccalaureate/ or  
13 education, nursing, diploma programs/ or nursing education research/ or inservice training/ or  
14 staff development/ or schools, health occupations/ or schools, medical/ or schools, nursing/ or  
15 schools, pharmacy/ or teaching/ or computer user training/ or models, educational/ or  
16 programmed instruction as topic/ or computer-assisted instruction/ or remedial teaching/ or  
17 simulation training/ or patient simulation/ or training support/ or academic medical centers/ or  
18 hospitals, teaching/ or hospitals, university/ or education department, hospital/  
19  
20 20 (curricul\* or instruction or teach or "interprofessional education" or "continuing medical  
21 education" or "professional development").mp.  
22  
23 21 ((course\* or staff or program\*) adj2 train\*).mp.  
24  
25 22 (training adj3 (guide or guides or guideline\* or material\*)).mp.  
26  
27 23 ("on the job training" or "on-the-job training").mp.  
28  
29 24 or/1-5  
30  
31 25 or/6-14  
32  
33 26 or/15-18  
34  
35 27 or/19-23  
36  
37 28 and/24-27  
38  
39 29 limit 28 to english language  
40  
41  
42  
43  
44  
45  
46  
47  
48  
49  
50  
51  
52  
53  
54  
55  
56  
57  
58  
59  
60

TABLE 2. Search Strategy for ERIC

| #  | Search term(s)                                                                                                                                                                                                                                                                                                                                                                                    |
|----|---------------------------------------------------------------------------------------------------------------------------------------------------------------------------------------------------------------------------------------------------------------------------------------------------------------------------------------------------------------------------------------------------|
| 1  | primary health care/ or "family practice (medicine)"/                                                                                                                                                                                                                                                                                                                                             |
| 2  | ((primary or "primary care" or family or general) adj (doctor* or physician* or practice* or practitioner* or medicine or "family health team*")).mp.                                                                                                                                                                                                                                             |
| 3  | ((primary care or family practice or family health or family or general practice) adj nurs*).mp.                                                                                                                                                                                                                                                                                                  |
| 4  | ("general practice clinic*" or "family practice clinic*" or "primary care clinic*" or "family clinic*" or "medical home").mp.                                                                                                                                                                                                                                                                     |
| 5  | "family nurse practitioner*".mp.                                                                                                                                                                                                                                                                                                                                                                  |
| 6  | mental disorders/ or exp anxiety disorders/ or exp dementia/ or exp emotional disturbances/ or exp neurosis/ or exp pervasive developmental disorders/ or exp psychosis/                                                                                                                                                                                                                          |
| 7  | behavior disorders/                                                                                                                                                                                                                                                                                                                                                                               |
| 8  | alcoholism/                                                                                                                                                                                                                                                                                                                                                                                       |
| 9  | substance abuse/ or exp alcohol abuse/ or exp drug abuse/                                                                                                                                                                                                                                                                                                                                         |
| 10 | psychiatric services/                                                                                                                                                                                                                                                                                                                                                                             |
| 11 | psychological services/                                                                                                                                                                                                                                                                                                                                                                           |
| 12 | mental health programs/                                                                                                                                                                                                                                                                                                                                                                           |
| 13 | psychiatry/                                                                                                                                                                                                                                                                                                                                                                                       |
| 14 | psychologists/                                                                                                                                                                                                                                                                                                                                                                                    |
| 15 | medical psychiatry.mp.                                                                                                                                                                                                                                                                                                                                                                            |
| 16 | interdisciplinary approach/ or interprofessional relationship/ or interpersonal relationship/ or teamwork/ or institutional cooperation/ or cooperation/                                                                                                                                                                                                                                          |
| 17 | (co-located or patient-centered patient-centred or patient centred or patient centered).mp.                                                                                                                                                                                                                                                                                                       |
| 18 | ((coordinated or clinical or critical or care or integrat* or collaborat* or comprehensive or stepped or psychosomatic or shared or interprofessional or behavioural health or behavioral health) adj (treat* or team* or care or path* or managed or management or mental-health or mental health or psychosomatic or behavioural health or behavioral health or healthcare or health care)).mp. |
| 19 | curriculum/                                                                                                                                                                                                                                                                                                                                                                                       |
| 20 | curriculum development/                                                                                                                                                                                                                                                                                                                                                                           |
| 21 | "clinical teaching (health professions)"/                                                                                                                                                                                                                                                                                                                                                         |
| 22 | professional development/                                                                                                                                                                                                                                                                                                                                                                         |
| 23 | staff development/                                                                                                                                                                                                                                                                                                                                                                                |
| 24 | capacity building/                                                                                                                                                                                                                                                                                                                                                                                |
| 25 | continuing education/ or professional continuing education/                                                                                                                                                                                                                                                                                                                                       |
| 26 | simulation/ or computer simulation/ or role playing/                                                                                                                                                                                                                                                                                                                                              |
| 27 | professional education/                                                                                                                                                                                                                                                                                                                                                                           |
| 28 | medical education/ or graduate medical education/ or nursing education/ or pharmaceutical education/ or allied health occupations education/                                                                                                                                                                                                                                                      |
| 29 | educational strategies/                                                                                                                                                                                                                                                                                                                                                                           |
| 30 | experiential learning/ or field experience programs/ or internship programs/                                                                                                                                                                                                                                                                                                                      |
| 31 | training methods/                                                                                                                                                                                                                                                                                                                                                                                 |

**# Search term(s)****32** on the job training/**33** instructional materials/ or textbooks/ or workbooks/**34** graduate medical education/**35** medical schools/**36** (curricul\* or instruction or teach or "interprofessional education" or "continuing medical education" or "professional development").mp.**37** ((course\* or staff or program\*) adj train\*).mp.**38** (training adj (guide or guides or guideline\* or material\*)).mp.**39** ("on the job training" or "on-the-job training").mp.**40** or/1-5**41** or/6-15**42** or/16-18**43** or/19-39**44** and/40-43**45** limit to english language

**TABLE 3. Search Strategy for Scopus****# Search term(s)**

- 1 TITLE-ABS-KEY ((( "family service\*" OR "family practice\*" OR "family practitioner\*" OR "family physician\*" OR "family doctor\*" OR "family nurse\*" OR "family team" OR "family teams" OR "family health" OR "family health care" OR "family healthcare" OR "family clinic\*" OR "family medicine" )) OR (( "general service\*" OR "general practice\*" OR "general practitioner\*" OR "general physician\*" OR "general doctor\*" OR "general nurse\*" OR "general team" OR "general teams" OR "general health" OR "general health care" OR "general healthcare" OR "general clinic\*" OR "general medicine" )) OR (( "primary care service\*" OR "primary care practice\*" OR "primary care practitioner\*" OR "primary care physician\*" OR "primary care doctor\*" OR "primary care nurse\*" OR "primary care team" OR "primary care teams" OR "primary care health" OR "primary care clinic\*" OR "primary care medicine" )) OR (( "primary service\*" OR "primary practice\*" OR "primary practitioner\*" OR "primary physician\*" OR "primary doctor\*" OR "primary nurse\*" OR "primary team" OR "primary teams" OR "primary health" OR "primary health care" OR "primary healthcare" OR "primary clinic\*" OR "primary medicine" )) OR (( "general practice service\*" OR "general practice physician\*" OR "general practice doctor\*" OR "general practice nurse\*" OR "general practice team" OR "general practice teams" OR "general practice health" OR "general practice health care" OR "general practice healthcare" OR "general practice clinic\*" OR "general practice medicine" )) OR (( "family practice service\*" OR "family practice physician\*" OR "family practice doctor\*" OR "family practice nurse\*" OR "family practice team" OR "family practice teams" OR "family practice health" OR "family practice health care" OR "family practice healthcare" OR "family practice clinic\*" OR "family practice medicine" )) OR (( "family health service\*" OR "family health physician\*" OR "family health doctor\*" OR "family health nurse\*" OR "family health team" OR "family health teams" OR "family health clinic\*" OR "family health medicine" ))))
- 2 TITLE-ABS-KEY ((( patient care OR patient-centered OR patient-centred OR patient centered OR patient centred OR coordinated OR clinical OR critical OR care OR integrat\* OR collaborat\* OR multidisciplinary OR comprehensive OR stepped OR psychosomatic OR shared OR behavioral health OR behavioural health OR interprofessional ) AND ( treat\* OR team\* OR care OR path\* OR managed OR management OR mental-health OR mental health OR psychosomatic OR behavioural health OR behavioral health OR healthcare OR health care OR health-care )))
- 3 TITLE-ABS-KEY (( psychiatr\* OR psycholog\* OR mental health OR mental disorder\* OR mental illness\* OR addiction OR alcoholi\* OR substance abuse\* OR substance-related disorder\* ))
- 4 TITLE-ABS-KEY ((( professional OR interprofessional OR continuing OR course\* OR staff OR program\* OR physician\* OR nurs\* OR simulation OR medical ) AND ( train\* OR education\* OR development )) OR ( training AND ( guide OR guides OR guideline\* OR material\* )) OR ( curricul\* OR instruction OR teach OR "continuing medical education" OR retrain\* OR inservice OR "on the job training" OR "on-the-job training" ))
- 5 #1 and #2 and #3 and #4

**TABLE 3. Search Strategy for Web of Science.** The following Indices were queried:

- Science Citation Index Expanded (SCI-EXPANDED) --1900-present
- Social Sciences Citation Index (SSCI) --1956-present
- Arts & Humanities Citation Index (A&HCI) --1975-present
- Conference Proceedings Citation Index- Science (CPCI-S) --1990-present
- Conference Proceedings Citation Index- Social Science & Humanities (CPCI-SSH) --1990-present
- Emerging Sources Citation Index (ESCI) --2015-present

**# Search term(s)**

- 1** TS=((family or general or "primary care" or primary or "general practice" or "family practice" or "family health") NEAR/2 (service\* or practice\* or practitioner\* or physician\* or doctor\* or nurs\* or team or teams or health or "health care" or healthcare or clinic\* or medicine))
- 2** TS=(psychiatr\* or psycholog\* or "mental health" or "mental disorder\*" or "mental illness\*" or addiction or alcoholi\* or "substance abuse\*" or "substance-related disorder\*")
- 3** TOPIC: (((("patient care" or "patient-centered" or "patient-centred" or "patient centered" or "patient centred" or coordinated or clinical or critical or care or integrat\$ or collaborat\* or multidisciplinary or comprehensive or stepped or psychosomatic or shared or "behavioral health" or "behavioural health" or interprofessional) NEAR/4 (treat\* or team\* or care or path\* or managed or management or mental-health or "mental health" or psychosomatic or "behavioural health" or "behavioral health" or healthcare or "health care" or "health-care"))))
- 4** TOPIC: ((curricul\* or instruction or teach or "continuing medical education" or retrain\* or inservice))
- 5** TOPIC: (((professional or interprofessional or continuing or course\* or staff or program\* or physician\* or nurs\* or simulation or medical) NEAR/2 (train\* or education\* or development)))
- 6** TOPIC: (training NEAR/3 (guide or guides or guideline\* or material\*))
- 7** TOPIC: (("on the job training" or "on-the-job training"))
- 8** #7 OR #6 OR #5 OR #4
- 9** (#8 AND #3 AND #2 AND #1) AND LANGUAGE: (English)
- 10** (WC=(psychology\* OR psychiatry OR primary health care OR emergency medicine)) OR (SU=(Life Sciences & Biomedicine OR Behavioral Sciences OR Critical Care Medicine OR Developmental Biology OR Emergency Medicine OR General & Internal Medicine OR Health Care Sciences & Services OR Social Work OR Integrative & Complementary Medicine OR Life Sciences Biomedicine Other Topics OR Neurosciences & Neurology OR Nursing OR Pharmacology & Pharmacy OR Psychiatry OR Research & Experimental Medicine OR Substance Abuse OR Psychology OR Social Work))
- 11** (WC=(Education & Educational Research or Education, Scientific Disciplines or Education, Special)) OR (SU=( Education & Educational Research))
- 12** #10 AND #9
- 13** #12 AND #11
