# Supplementary material for: Scoping review protocol: education initiatives for medical psychiatry collaborative care
Source: PubMed Central journal article supplement — BMJ Open. 2017 Sep 3;7(9):e015886. doi: 10.1136/bmjopen-2017-015886 (PMC5588937; doi:10.1136/bmjopen-2017-015886), 2017-09-03
Supplement: bmjopen-2017-015886supp001.pdf [file bmjopen-2017-015886supp001.pdf]

## Appendix A – Scoping Review Search Strategy

**Table 1. Search strategy for MEDLINE, MEDLINE In-Progress, PsycINFO, EMBASE, and CINAHL.**

NB: Only MEDLINE search strategy included. The search strategies for the other databases were similar in structure with similar search terms and synonyms. Contact the corresponding author for the full search strategy for each database.

| #  | Search Term(s)                                                                                                                                                                                                                                                                                                                                           |
|----|----------------------------------------------------------------------------------------------------------------------------------------------------------------------------------------------------------------------------------------------------------------------------------------------------------------------------------------------------------|
| 1  | Family Practice/ or General Practice/ or Physicians, Family/ or Physicians, Primary Care/ or General Practitioners/ or Primary Health Care/                                                                                                                                                                                                              |
| 2  | ((primary or "primary care" or family or general) adj2 (doctor* or physician* or practice* or practitioner* or medicine)) or "family health team*").mp.                                                                                                                                                                                                  |
| 3  | ((primary care or family practice or family health or family or general practice) adj2 nurs*).mp.                                                                                                                                                                                                                                                        |
| 4  | ("general practice clinic*" or "family practice clinic*" or "primary care clinic*" or "family clinic*" or "medical home").mp.                                                                                                                                                                                                                            |
| 5  | Family Nurse Practitioners/ or "family nurse practitioner*").mp.                                                                                                                                                                                                                                                                                         |
| 6  | exp psychiatry/ or psychology/                                                                                                                                                                                                                                                                                                                           |
| 7  | medical psychiatry.mp.                                                                                                                                                                                                                                                                                                                                   |
| 8  | mental health services/                                                                                                                                                                                                                                                                                                                                  |
| 9  | exp mental disorders/ or exp substance-related disorders/                                                                                                                                                                                                                                                                                                |
| 10 | child guidance/                                                                                                                                                                                                                                                                                                                                          |
| 11 | psychiatric nursing/                                                                                                                                                                                                                                                                                                                                     |
| 12 | community mental health services/                                                                                                                                                                                                                                                                                                                        |
| 13 | social work, psychiatric/                                                                                                                                                                                                                                                                                                                                |
| 14 | emergency services, psychiatric/                                                                                                                                                                                                                                                                                                                         |
| 15 | "Delivery of Health Care, Integrated"/ or Comprehensive Health Care/ or "Continuity of Patient Care"/ or Interprofessional Relations/ or Interdisciplinary Communication/ or exp Patient Care Planning/ or exp Patient Care Team/ or Cooperative Behavior/ or Case Management/ or Patient-centered Care/ or Patient Navigation/                          |
| 16 | (co-located or patient-centered or patient centred or patient centered).mp.                                                                                                                                                                                                                                                                              |
| 17 | ((clinical or critical or care or integrat\$ or collaborat* or comprehensive or stepped or psychosomatic or shared or "behavioral health" or interprofessional) adj4 (treat\$ or team* or care* or path*)).mp.                                                                                                                                           |
| 18 | ((coordinated or clinical or critical or care or integrat\$ or collaborat* or comprehensive or stepped or psychosomatic or shared or interprofessional) adj4 (treat* or team* or care or path* or managed or management or mental-health or mental health or psychosomatic or behavioural health or behavioral health or healthcare or health care)).mp. |

# Search Term(s)

- 19 education/ or curriculum/ or competency-based education/ or interdisciplinary studies/ or "mainstreaming (education)"/ or problem-based learning/ or education, distance/ or education, premedical/ or education, professional/ or education, continuing/ or education, medical, continuing/ or education, nursing, continuing/ or education, pharmacy, continuing/ or education, professional, retraining/ or education, graduate/ or education, medical, graduate/ or education, nursing, graduate/ or education, pharmacy, graduate/ or education, medical/ or education, medical, undergraduate/ or "internship and residency"/ or teaching rounds/ or education, nursing/ or education, nursing, associate/ or education, nursing, baccalaureate/ or education, nursing, diploma programs/ or nursing education research/ or inservice training/ or staff development/ or schools, health occupations/ or schools, medical/ or schools, nursing/ or schools, pharmacy/ or teaching/ or computer user training/ or models, educational/ or programmed instruction as topic/ or computer-assisted instruction/ or remedial teaching/ or simulation training/ or patient simulation/ or training support/ or academic medical centers/ or hospitals, teaching/ or hospitals, university/ or education department, hospital/
- 20 (curricul\* or instruction or teach or "interprofessional education" or "continuing medical education" or "professional development").mp.
- 21 ((course\* or staff or program\*) adj2 train\*).mp.
- 22 (training adj3 (guide or guides or guideline\* or material\*)).mp.
- 23 ("on the job training" or "on-the-job training").mp.
- 24 or/1-5
- 25 or/6-14
- 26 or/15-18
- 27 or/19-23
- 28 and/24-27
- 29 limit 28 to english language

**TABLE 2. Search Strategy for ERIC**

| #  | Search term(s)                                                                                                                                                                                                                                                                                                                                                                                    |
|----|---------------------------------------------------------------------------------------------------------------------------------------------------------------------------------------------------------------------------------------------------------------------------------------------------------------------------------------------------------------------------------------------------|
| 1  | primary health care/ or "family practice (medicine)"/                                                                                                                                                                                                                                                                                                                                             |
| 2  | ((primary or "primary care" or family or general) adj (doctor* or physician* or practice* or practitioner* or medicine or "family health team*")).mp.                                                                                                                                                                                                                                             |
| 3  | ((primary care or family practice or family health or family or general practice) adj nurs*).mp.                                                                                                                                                                                                                                                                                                  |
| 4  | ("general practice clinic*" or "family practice clinic*" or "primary care clinic*" or "family clinic*" or "medical home").mp.                                                                                                                                                                                                                                                                     |
| 5  | "family nurse practitioner*".mp.                                                                                                                                                                                                                                                                                                                                                                  |
| 6  | mental disorders/ or exp anxiety disorders/ or exp dementia/ or exp emotional disturbances/ or exp neurosis/ or exp pervasive developmental disorders/ or exp psychosis/                                                                                                                                                                                                                          |
| 7  | behavior disorders/                                                                                                                                                                                                                                                                                                                                                                               |
| 8  | alcoholism/                                                                                                                                                                                                                                                                                                                                                                                       |
| 9  | substance abuse/ or exp alcohol abuse/ or exp drug abuse/                                                                                                                                                                                                                                                                                                                                         |
| 10 | psychiatric services/                                                                                                                                                                                                                                                                                                                                                                             |
| 11 | psychological services/                                                                                                                                                                                                                                                                                                                                                                           |
| 12 | mental health programs/                                                                                                                                                                                                                                                                                                                                                                           |
| 13 | psychiatry/                                                                                                                                                                                                                                                                                                                                                                                       |
| 14 | psychologists/                                                                                                                                                                                                                                                                                                                                                                                    |
| 15 | medical psychiatry.mp.                                                                                                                                                                                                                                                                                                                                                                            |
| 16 | interdisciplinary approach/ or interprofessional relationship/ or interpersonal relationship/ or teamwork/ or institutional cooperation/ or cooperation/                                                                                                                                                                                                                                          |
| 17 | (co-located or patient-centered patient-centred or patient centred or patient centered).mp.                                                                                                                                                                                                                                                                                                       |
| 18 | ((coordinated or clinical or critical or care or integrat* or collaborat* or comprehensive or stepped or psychosomatic or shared or interprofessional or behavioural health or behavioral health) adj (treat* or team* or care or path* or managed or management or mental-health or mental health or psychosomatic or behavioural health or behavioral health or healthcare or health care)).mp. |
| 19 | curriculum/                                                                                                                                                                                                                                                                                                                                                                                       |
| 20 | curriculum development/                                                                                                                                                                                                                                                                                                                                                                           |
| 21 | "clinical teaching (health professions)"/                                                                                                                                                                                                                                                                                                                                                         |
| 22 | professional development/                                                                                                                                                                                                                                                                                                                                                                         |
| 23 | staff development/                                                                                                                                                                                                                                                                                                                                                                                |
| 24 | capacity building/                                                                                                                                                                                                                                                                                                                                                                                |
| 25 | continuing education/ or professional continuing education/                                                                                                                                                                                                                                                                                                                                       |
| 26 | simulation/ or computer simulation/ or role playing/                                                                                                                                                                                                                                                                                                                                              |
| 27 | professional education/                                                                                                                                                                                                                                                                                                                                                                           |
| 28 | medical education/ or graduate medical education/ or nursing education/ or pharmaceutical education/ or allied health occupations education/                                                                                                                                                                                                                                                      |
| 29 | educational strategies/                                                                                                                                                                                                                                                                                                                                                                           |
| 30 | experiential learning/ or field experience programs/ or internship programs/                                                                                                                                                                                                                                                                                                                      |
| 31 | training methods/                                                                                                                                                                                                                                                                                                                                                                                 |

**# Search term(s)**

**32** on the job training/

**33** instructional materials/ or textbooks/ or workbooks/

**34** graduate medical education/

**35** medical schools/

**36** (curricul\* or instruction or teach or "interprofessional education" or "continuing medical education" or "professional development").mp.

**37** ((course\* or staff or program\*) adj train\*).mp.

**38** (training adj (guide or guides or guideline\* or material\*)).mp.

**39** ("on the job training" or "on-the-job training").mp.

**40** or/1-5

**41** or/6-15

**42** or/16-18

**43** or/19-39

**44** and/40-43

**45** limit to english language

**TABLE 3. Search Strategy for Scopus**

**# Search term(s)**

- 1** TITLE-ABS-KEY(((( "family service\*" OR "family practice\*" OR "family practitioner\*" OR "family physician\*" OR "family doctor\*" OR "family nurse\*" OR "family team" OR "family teams" OR "family health" OR "family health care" OR "family healthcare" OR "family clinic\*" OR "family medicine" )) OR (( "general service\*" OR "general practice\*" OR "general practitioner\*" OR "general physician\*" OR "general doctor\*" OR "general nurse\*" OR "general team" OR "general teams" OR "general health" OR "general health care" OR "general healthcare" OR "general clinic\*" OR "general medicine" )) OR (( "primary care service\*" OR "primary care practice\*" OR "primary care practitioner\*" OR "primary care physician\*" OR "primary care doctor\*" OR "primary care nurse\*" OR "primary care team" OR "primary care teams" OR "primary care health" OR "primary care clinic\*" OR "primary care medicine" )) OR (( "primary service\*" OR "primary practice\*" OR "primary practitioner\*" OR "primary physician\*" OR "primary doctor\*" OR "primary nurse\*" OR "primary team" OR "primary teams" OR "primary health" OR "primary health care" OR "primary healthcare" OR "primary clinic\*" OR "primary medicine" )) OR (( "general practice service\*" OR "general practice physician\*" OR "general practice doctor\*" OR "general practice nurse\*" OR "general practice team" OR "general practice teams" OR "general practice health" OR "general practice health care" OR "general practice healthcare" OR "general practice clinic\*" OR "general practice medicine" )) OR (( "family practice service\*" OR "family practice physician\*" OR "family practice doctor\*" OR "family practice nurse\*" OR "family practice team" OR "family practice teams" OR "family practice health" OR "family practice health care" OR "family practice healthcare" OR "family practice clinic\*" OR "family practice medicine" )) OR (( "family health service\*" OR "family health physician\*" OR "family health doctor\*" OR "family health nurse\*" OR "family health team" OR "family health teams" OR "family health clinic\*" OR "family health medicine" ))))
- 2** TITLE-ABS-KEY((( patient care OR patient-centered OR patient-centred OR patient centered OR patient centred OR coordinated OR clinical OR critical OR care OR integrat\* OR collaborat\* OR multidisciplinary OR comprehensive OR stepped OR psychosomatic OR shared OR behavioral health OR behavioural health OR interprofessional ) AND ( treat\* OR team\* OR care OR path\* OR managed OR management OR mental-health OR mental health OR psychosomatic OR behavioural health OR behavioral health OR healthcare OR health care OR health-care )))
- 3** TITLE-ABS-KEY(( psychiatr\* OR psycholog\* OR mental health OR mental disorder\* OR mental illness\* OR addiction OR alcoholi\* OR substance abuse\* OR substance-related disorder\* ))
- 4** TITLE-ABS-KEY((( professional OR interprofessional OR continuing OR course\* OR staff OR program\* OR physician\* OR nurs\* OR simulation OR medical ) AND ( train\* OR education\* OR development )) OR ( training AND ( guide OR guides OR guideline\* OR material\* )) OR ( curricul\* OR instruction OR teach OR "continuing medical education" OR retrain\* OR inservice OR "on the job training" OR "on-the-job training" ))
- 5** #1 and #2 and #3 and #4

**TABLE 3. Search Strategy for Web of Science.** The following Indices were queried:

- Science Citation Index Expanded (SCI-EXPANDED) --1900-present
- Social Sciences Citation Index (SSCI) --1956-present
- Arts & Humanities Citation Index (A&HCI) --1975-present
- Conference Proceedings Citation Index- Science (CPCI-S) --1990-present
- Conference Proceedings Citation Index- Social Science & Humanities (CPCI-SSH) --1990-present
- Emerging Sources Citation Index (ESCI) --2015-present

**# Search term(s)**

- 1** TS=((family or general or "primary care" or primary or "general practice" or "family practice" or "family health") NEAR/2 (service\* or practice\* or practitioner\* or physician\* or doctor\* or nurs\* or team or teams or health or "health care" or healthcare or clinic\* or medicine))
- 2** TS=(psychiatr\* or psycholog\* or "mental health" or "mental disorder\*" or "mental illness\*" or addiction or alcoholi\* or "substance abuse\*" or "substance-related disorder\*")
- 3** TOPIC: (((("patient care" or "patient-centered" or "patient-centred" or "patient centered" or "patient centred" or coordinated or clinical or critical or care or integrat\$ or collaborat\* or multidisciplinary or comprehensive or stepped or psychosomatic or shared or "behavioral health" or "behavioural health" or interprofessional) NEAR/4 (treat\* or team\* or care or path\* or managed or management or mental-health or "mental health" or psychosomatic or "behavioural health" or "behavioral health" or healthcare or "health care" or "health-care"))))
- 4** TOPIC: ((curricul\* or instruction or teach or "continuing medical education" or retrain\* or inservice))
- 5** TOPIC: (((professional or interprofessional or continuing or course\* or staff or program\* or physician\* or nurs\* or simulation or medical) NEAR/2 (train\* or education\* or development)))
- 6** TOPIC: (training NEAR/3 (guide or guides or guideline\* or material\*))
- 7** TOPIC: (("on the job training" or "on-the-job training"))
- 8** #7 OR #6 OR #5 OR #4
- 9** (#8 AND #3 AND #2 AND #1) AND LANGUAGE: (English)
- 10** (WC=(psychology\* OR psychiatry OR primary health care OR emergency medicine)) OR (SU=(Life Sciences & Biomedicine OR Behavioral Sciences OR Critical Care Medicine OR Developmental Biology OR Emergency Medicine OR General & Internal Medicine OR Health Care Sciences & Services OR Social Work OR Integrative & Complementary Medicine OR Life Sciences Biomedicine Other Topics OR Neurosciences & Neurology OR Nursing OR Pharmacology & Pharmacy OR Psychiatry OR Research & Experimental Medicine OR Substance Abuse OR Psychology OR Social Work))
- 11** (WC=(Education & Educational Research or Education, Scientific Disciplines or Education, Special)) OR (SU=( Education & Educational Research))
- 12** #10 AND #9
- 13** #12 AND #11
